# Supplementary material
Source: Frontiers journal article supplement (https://www.frontiersin.org/articles/218698)
Supplement: Presentation_1.PDF [file Presentation_1.PDF]

## *Supplementary Material*

### **Is the prosthetic homologue necessary or sufficient for embodiment?**

Chelsea Dornfeld<sup>1,2</sup>, Michelle Swanston<sup>1,3</sup>, Joseph Cassella<sup>1,4</sup>, Michael Wininger<sup>1,5,6</sup>

**\* Correspondence:**

Michael Wininger  
Prosthetics & Orthotics Program  
University of Hartford  
200 Bloomfield Avenue  
West Hartford, CT, 06117, USA  
wininger@hartford.edu

### **Supplementary Figures**

Supplementary figures follow on subsequent pages.

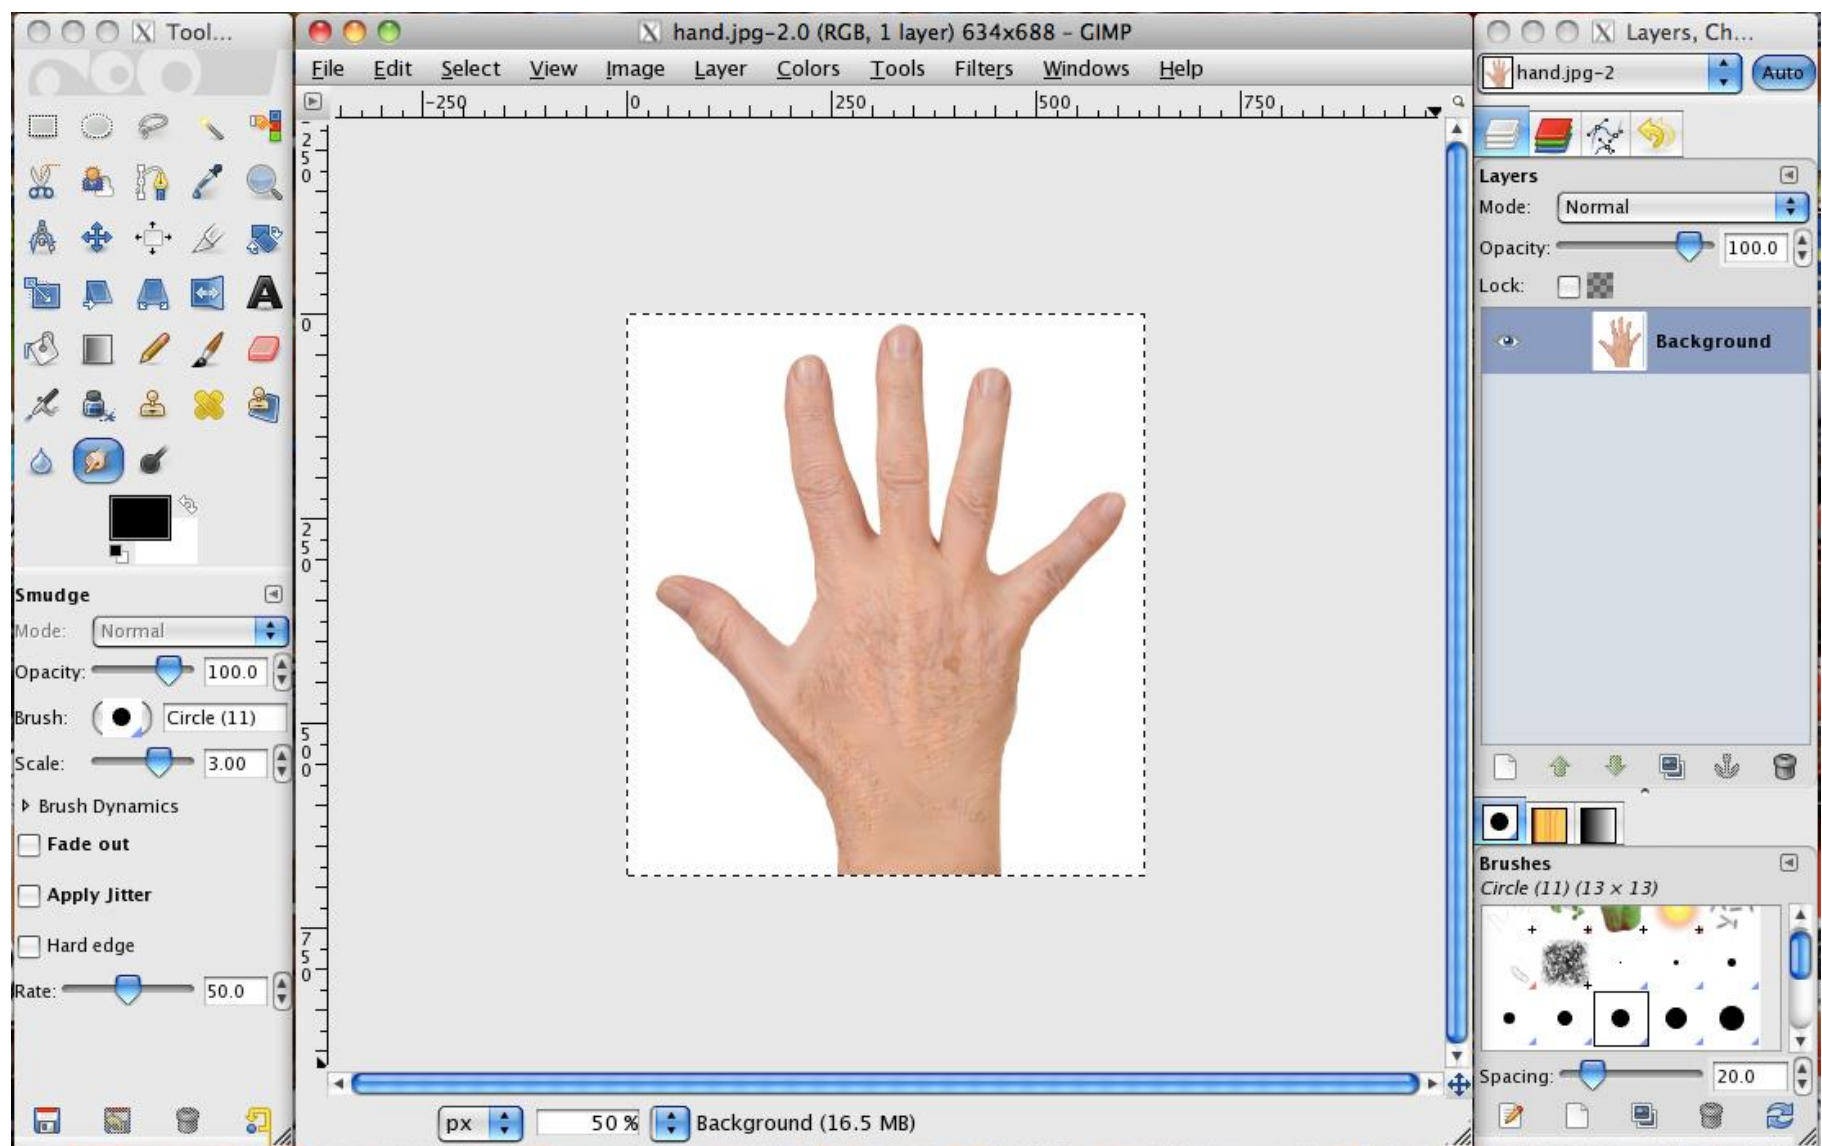

**Supplementary Figure 1. STEP 1:** Open image in GIMP.

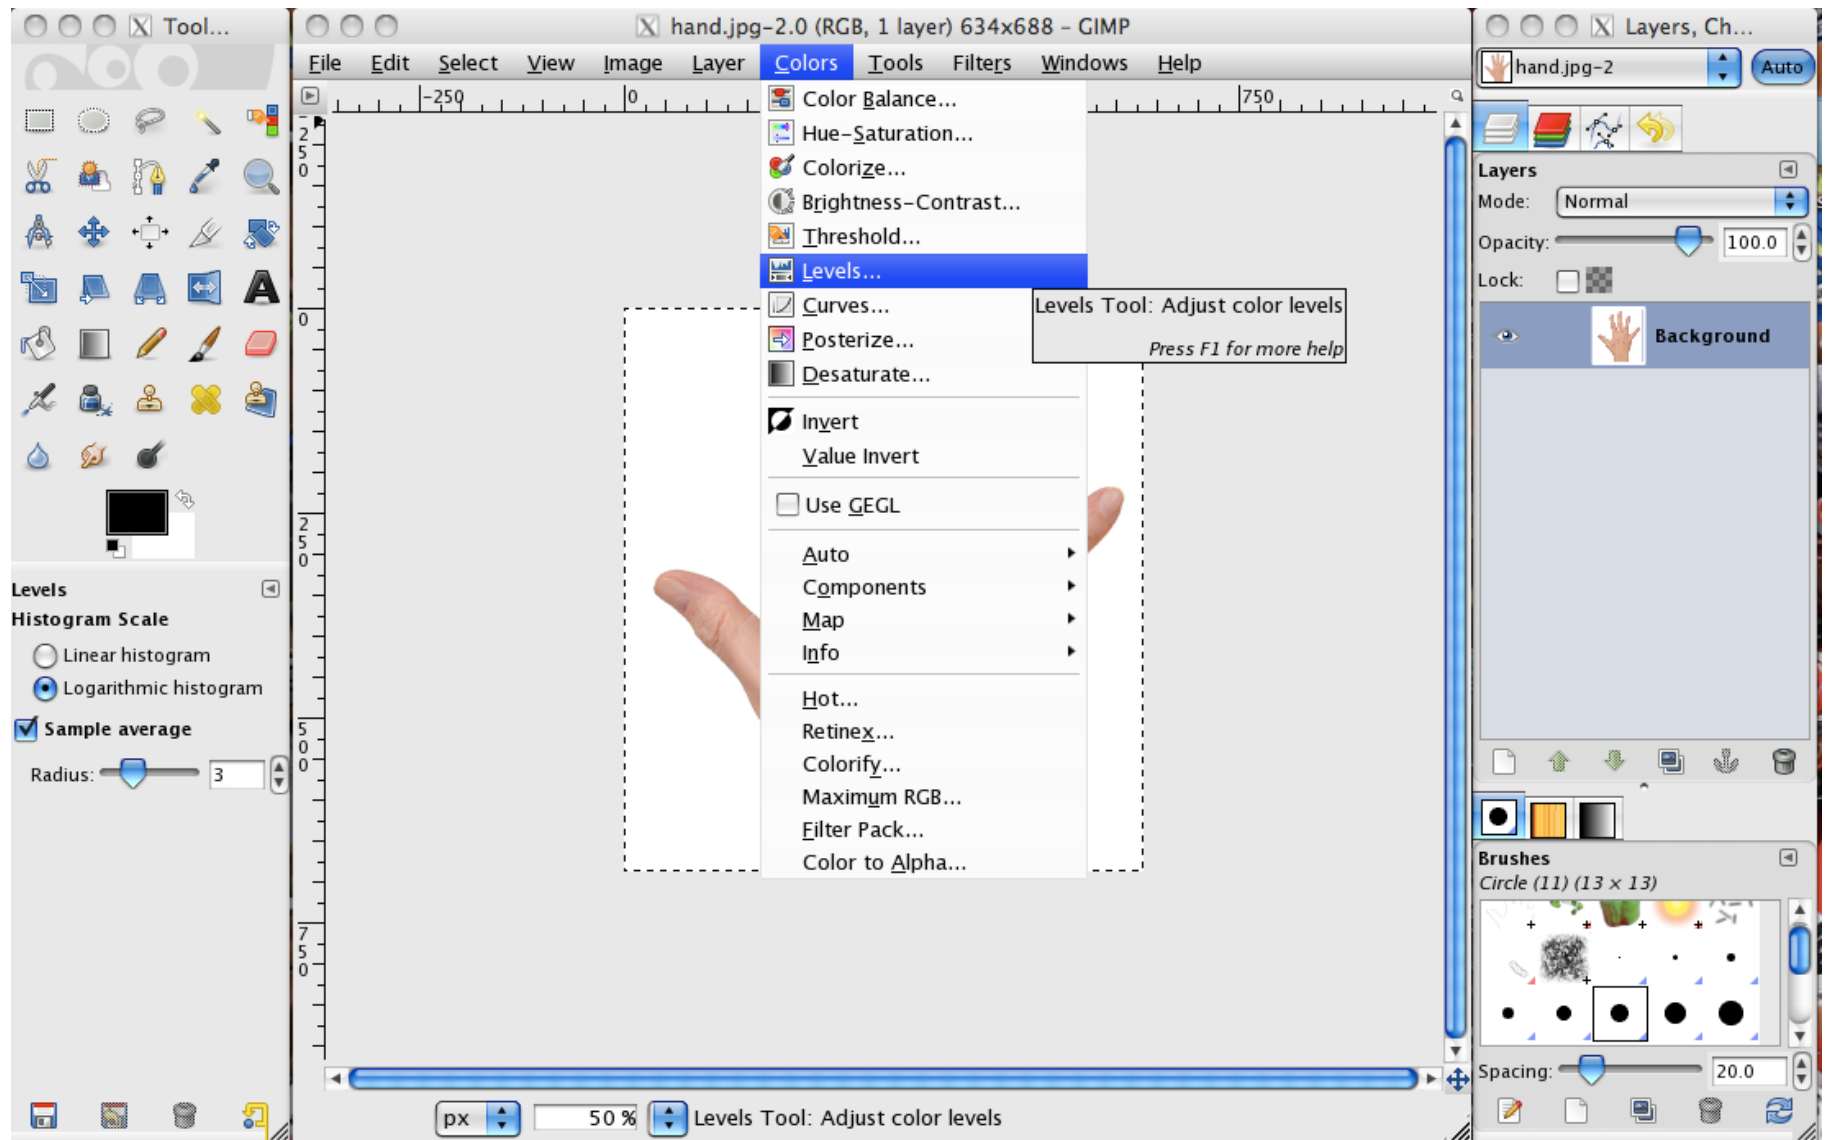

**Supplementary Figure 2.** STEP 2a: Access the image color level tool from Color > Levels menu.

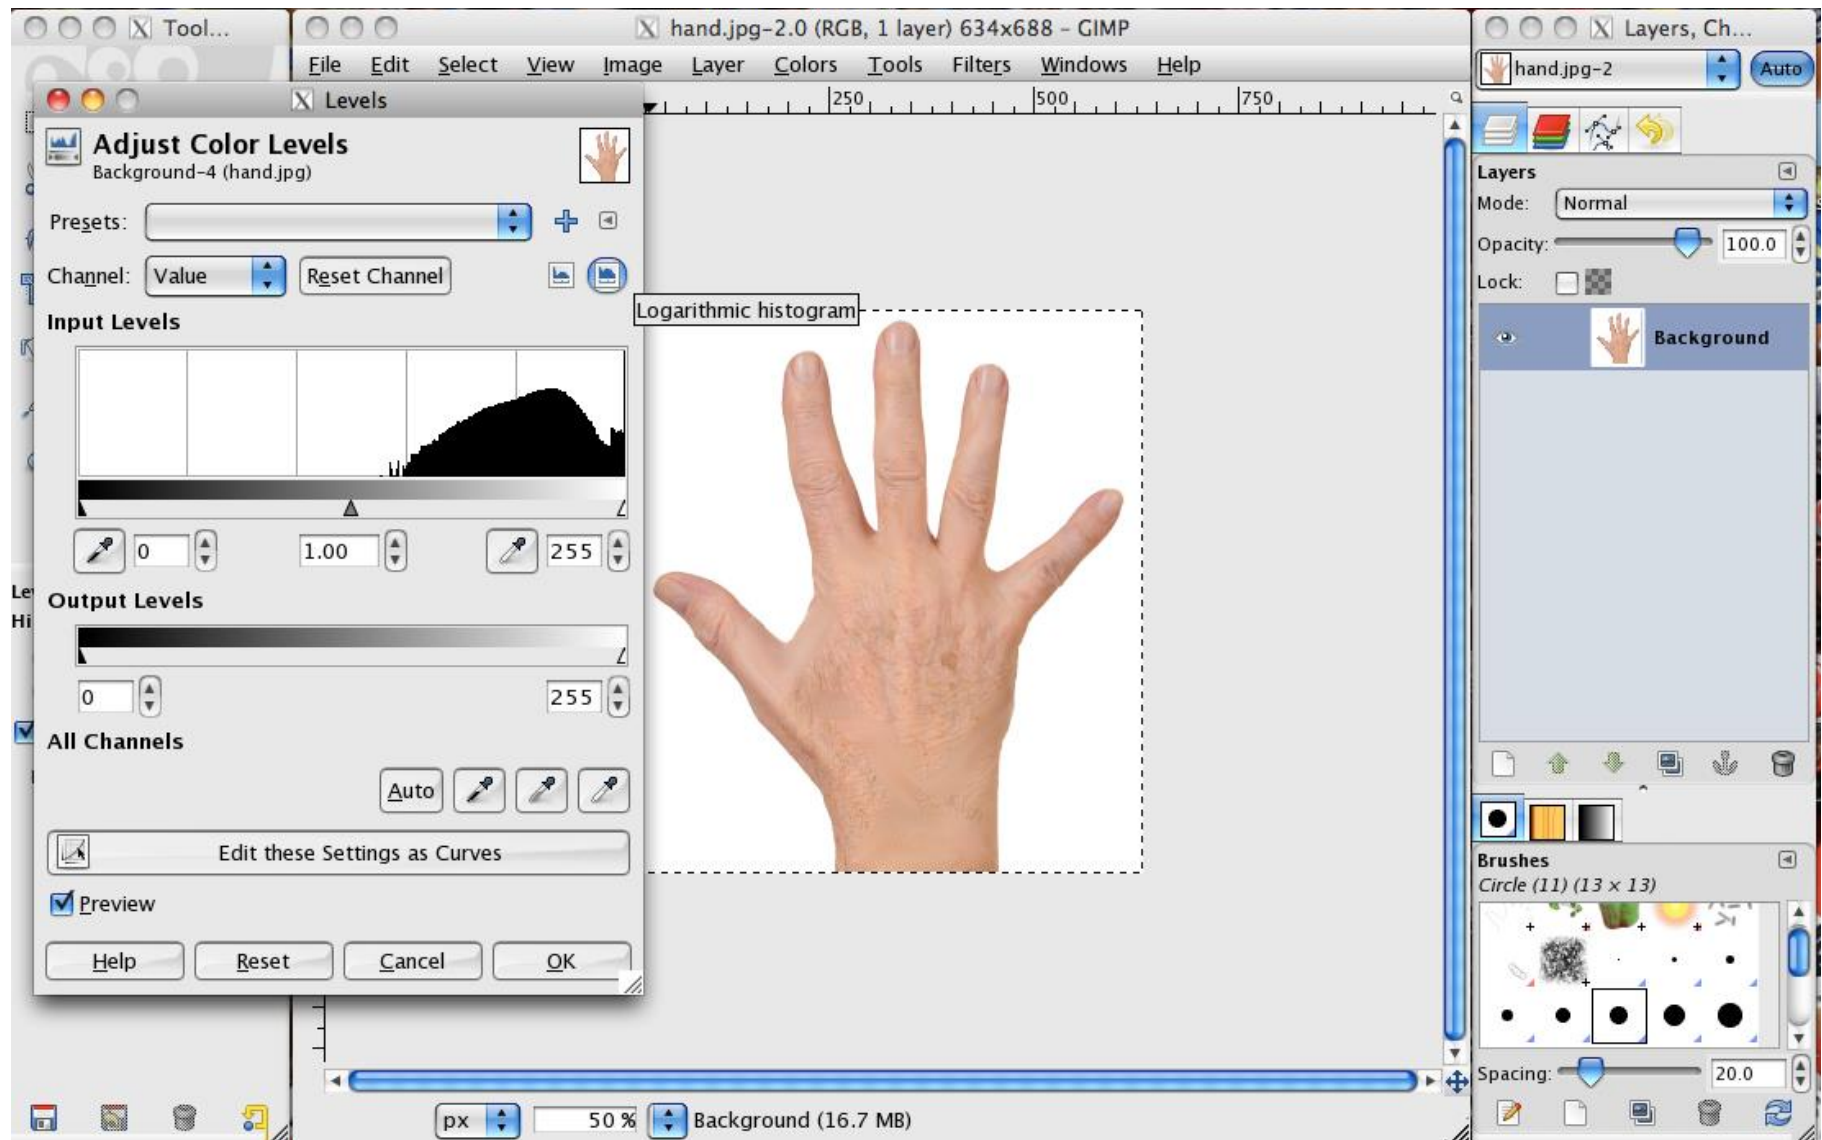

**Supplementary Figure 3. STEP 2b:** It may be helpful to view the histogram on Log scale (button near top-right).

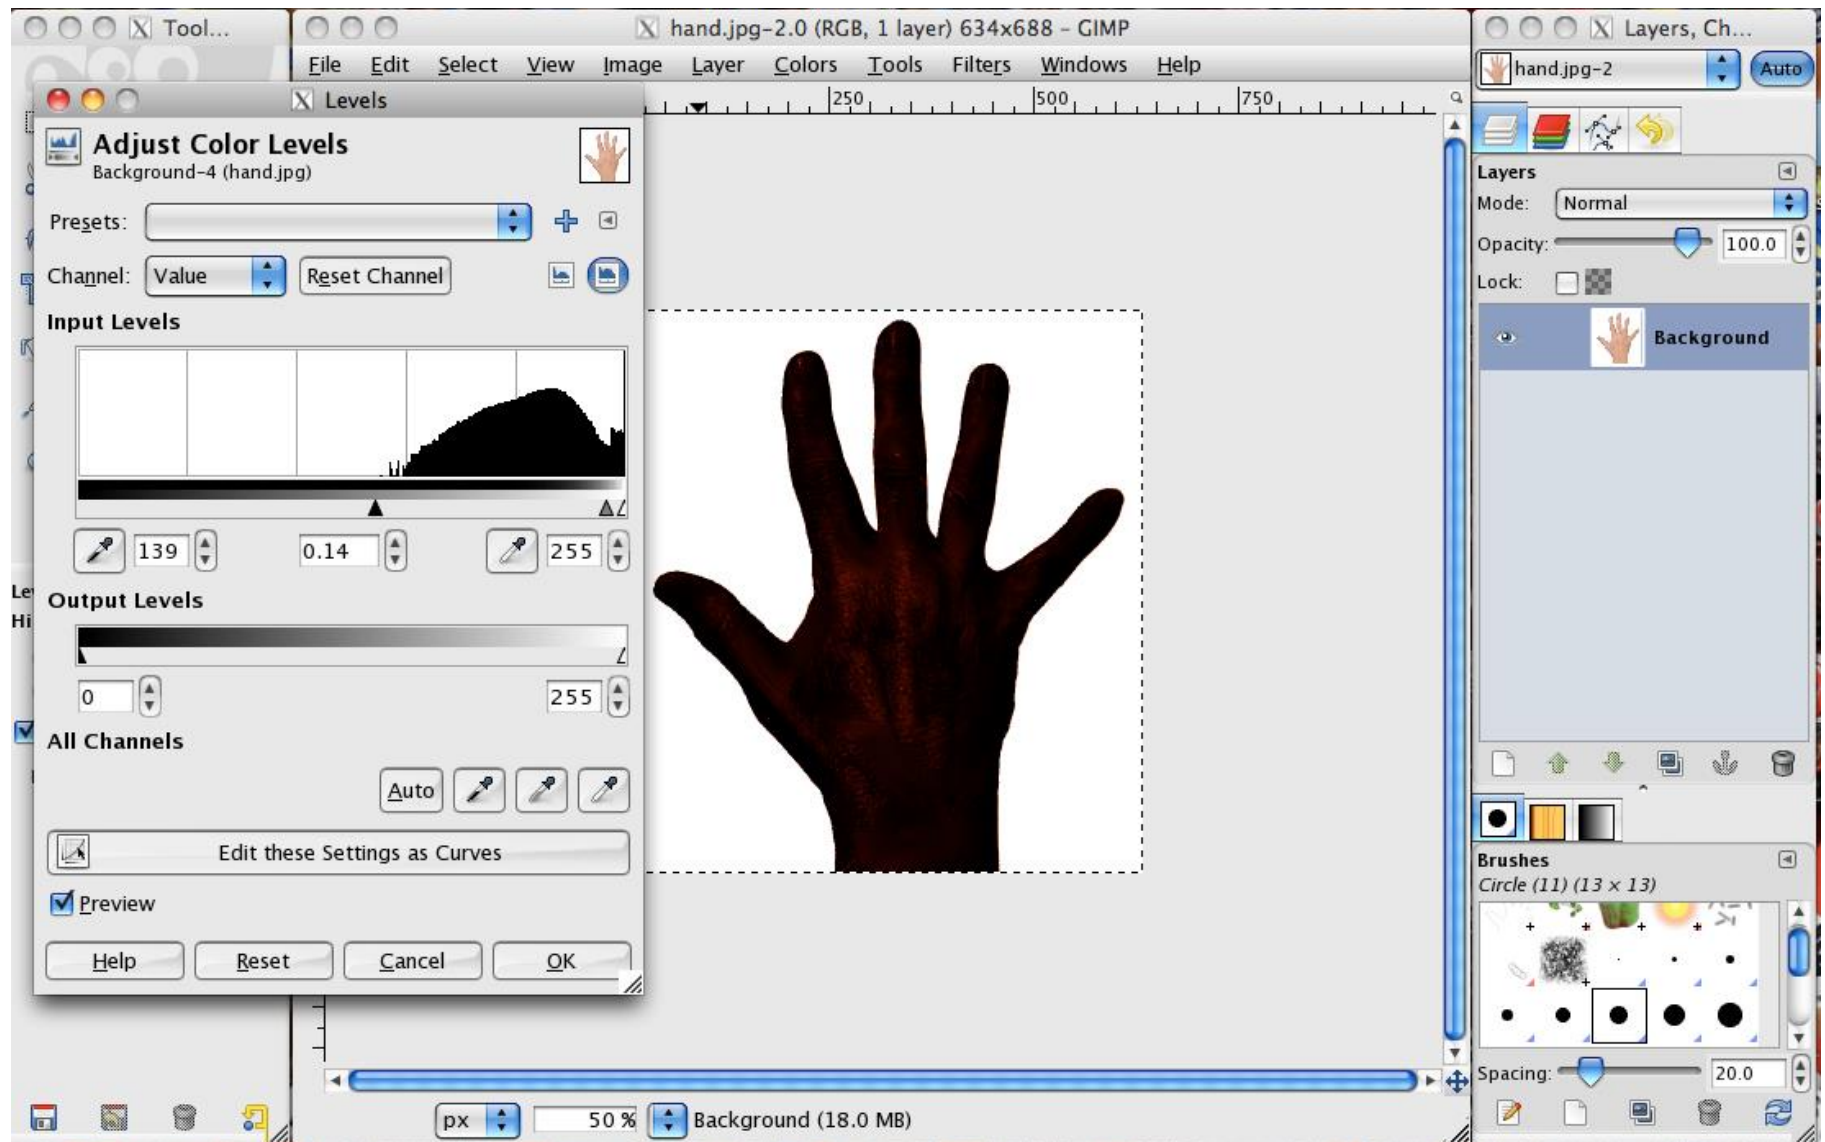

**Supplementary Figure 4.** STEP 2c: Move the histogram sliders so that the 2nd slider (grey) is in the notch between histogram nodes. If no notch, slide to the far right.



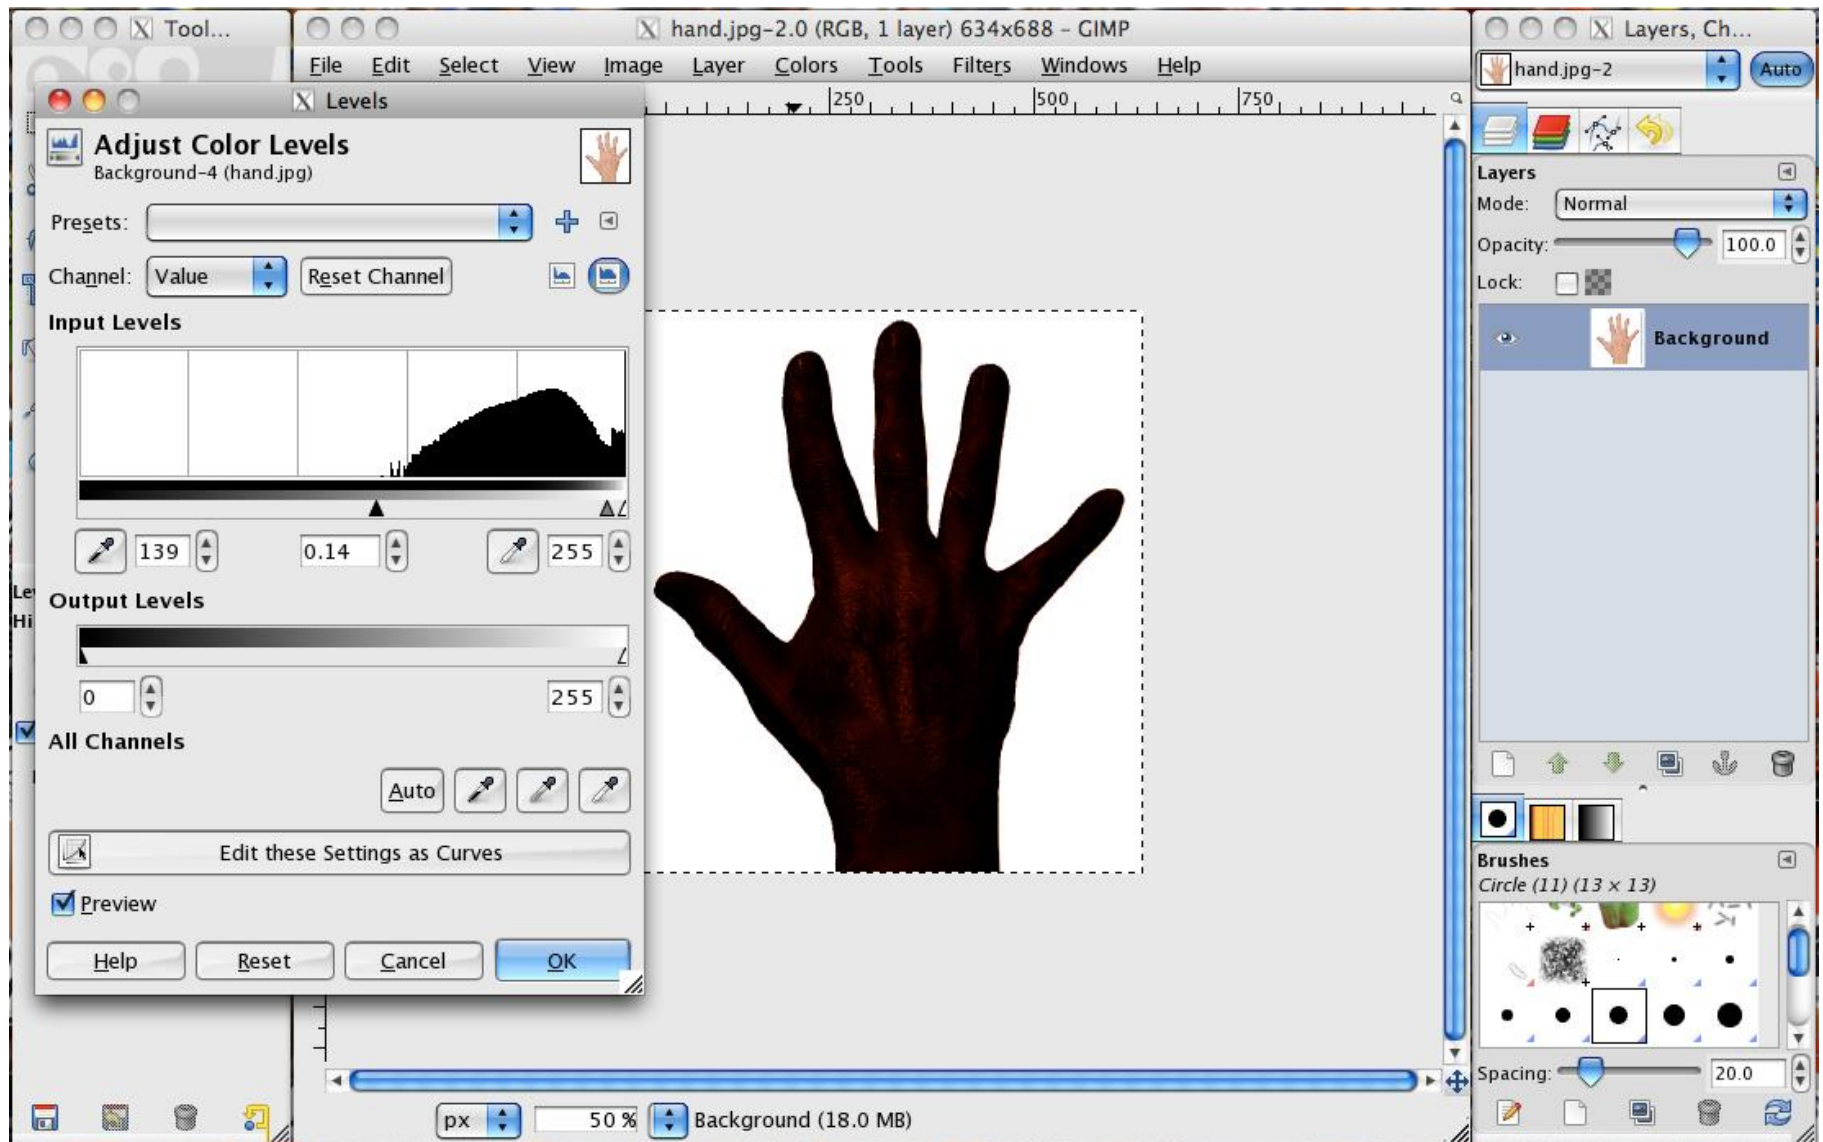

Supplementary Figure 5. STEP 2d: Click 'OK'.

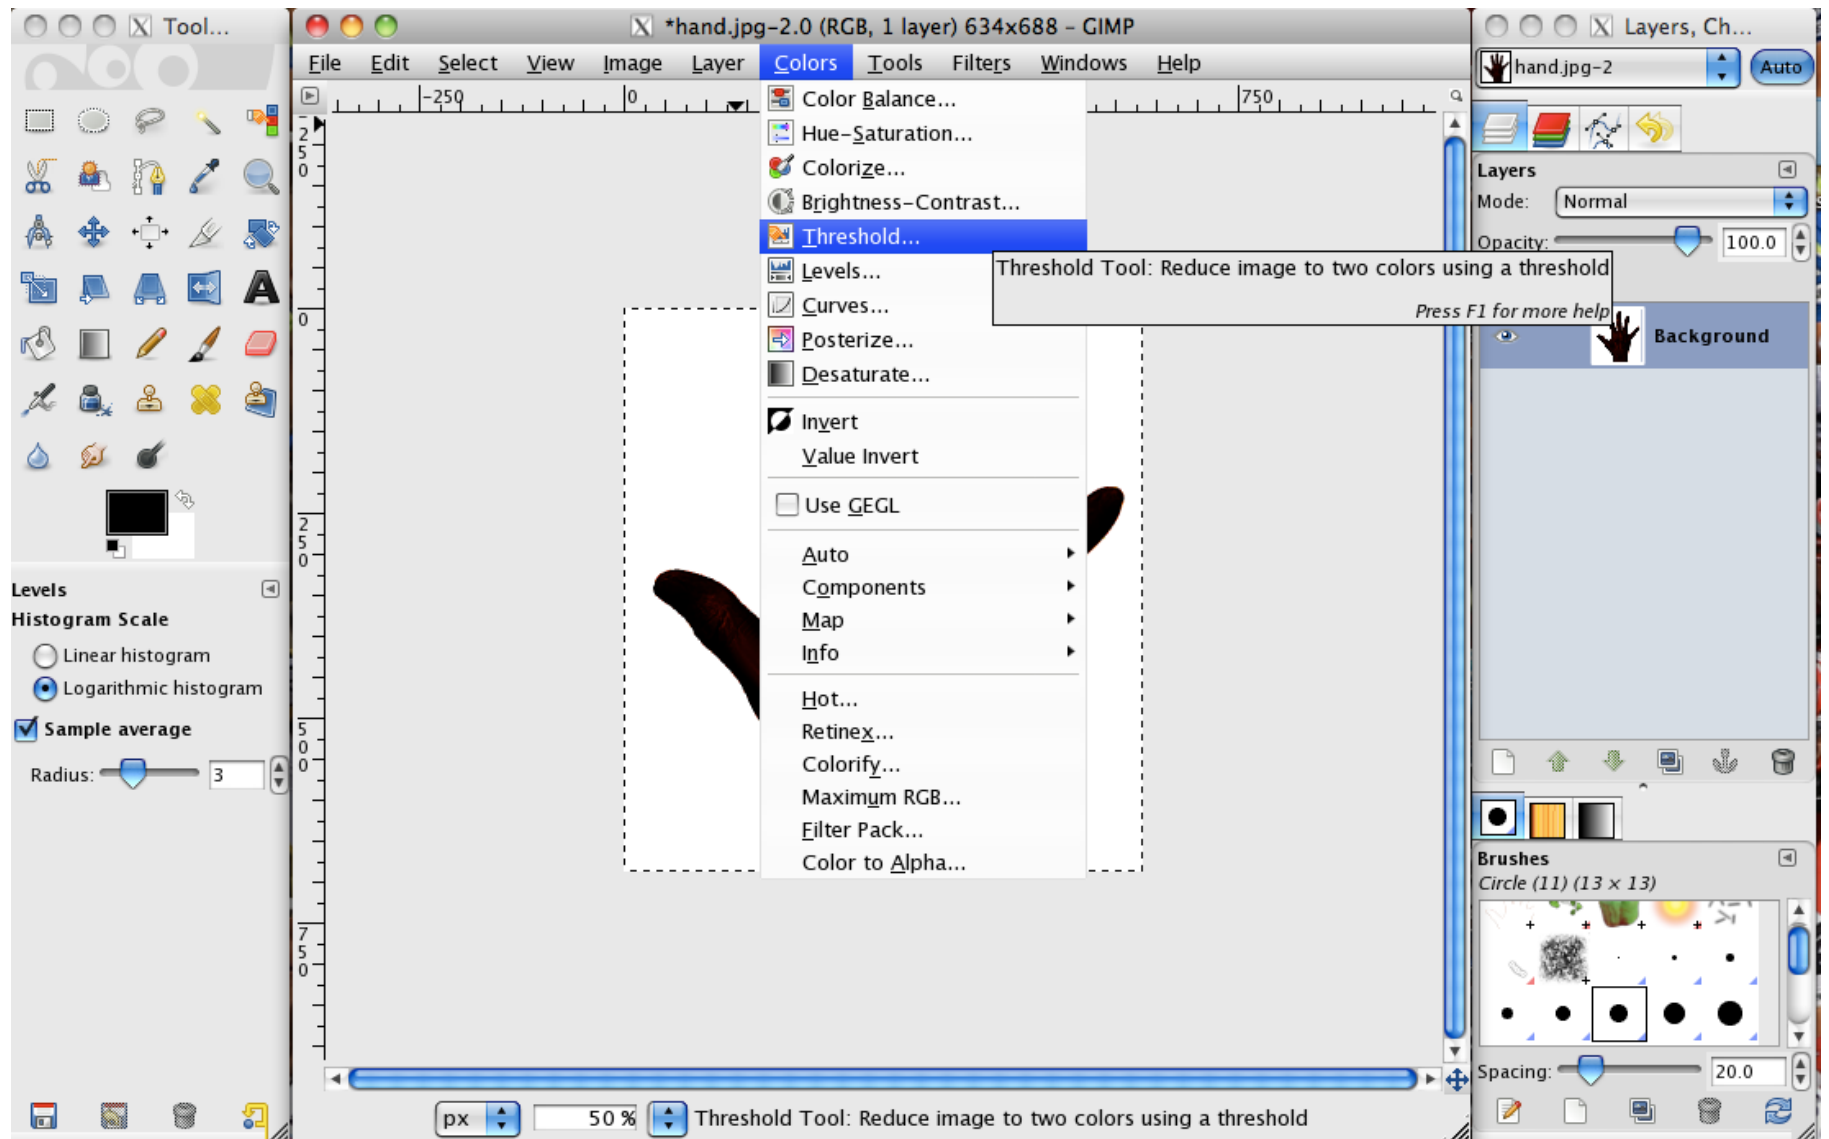

**Supplementary Figure 6.** STEP 3a: Access the image color threshold tool from Color > Threshold menu.

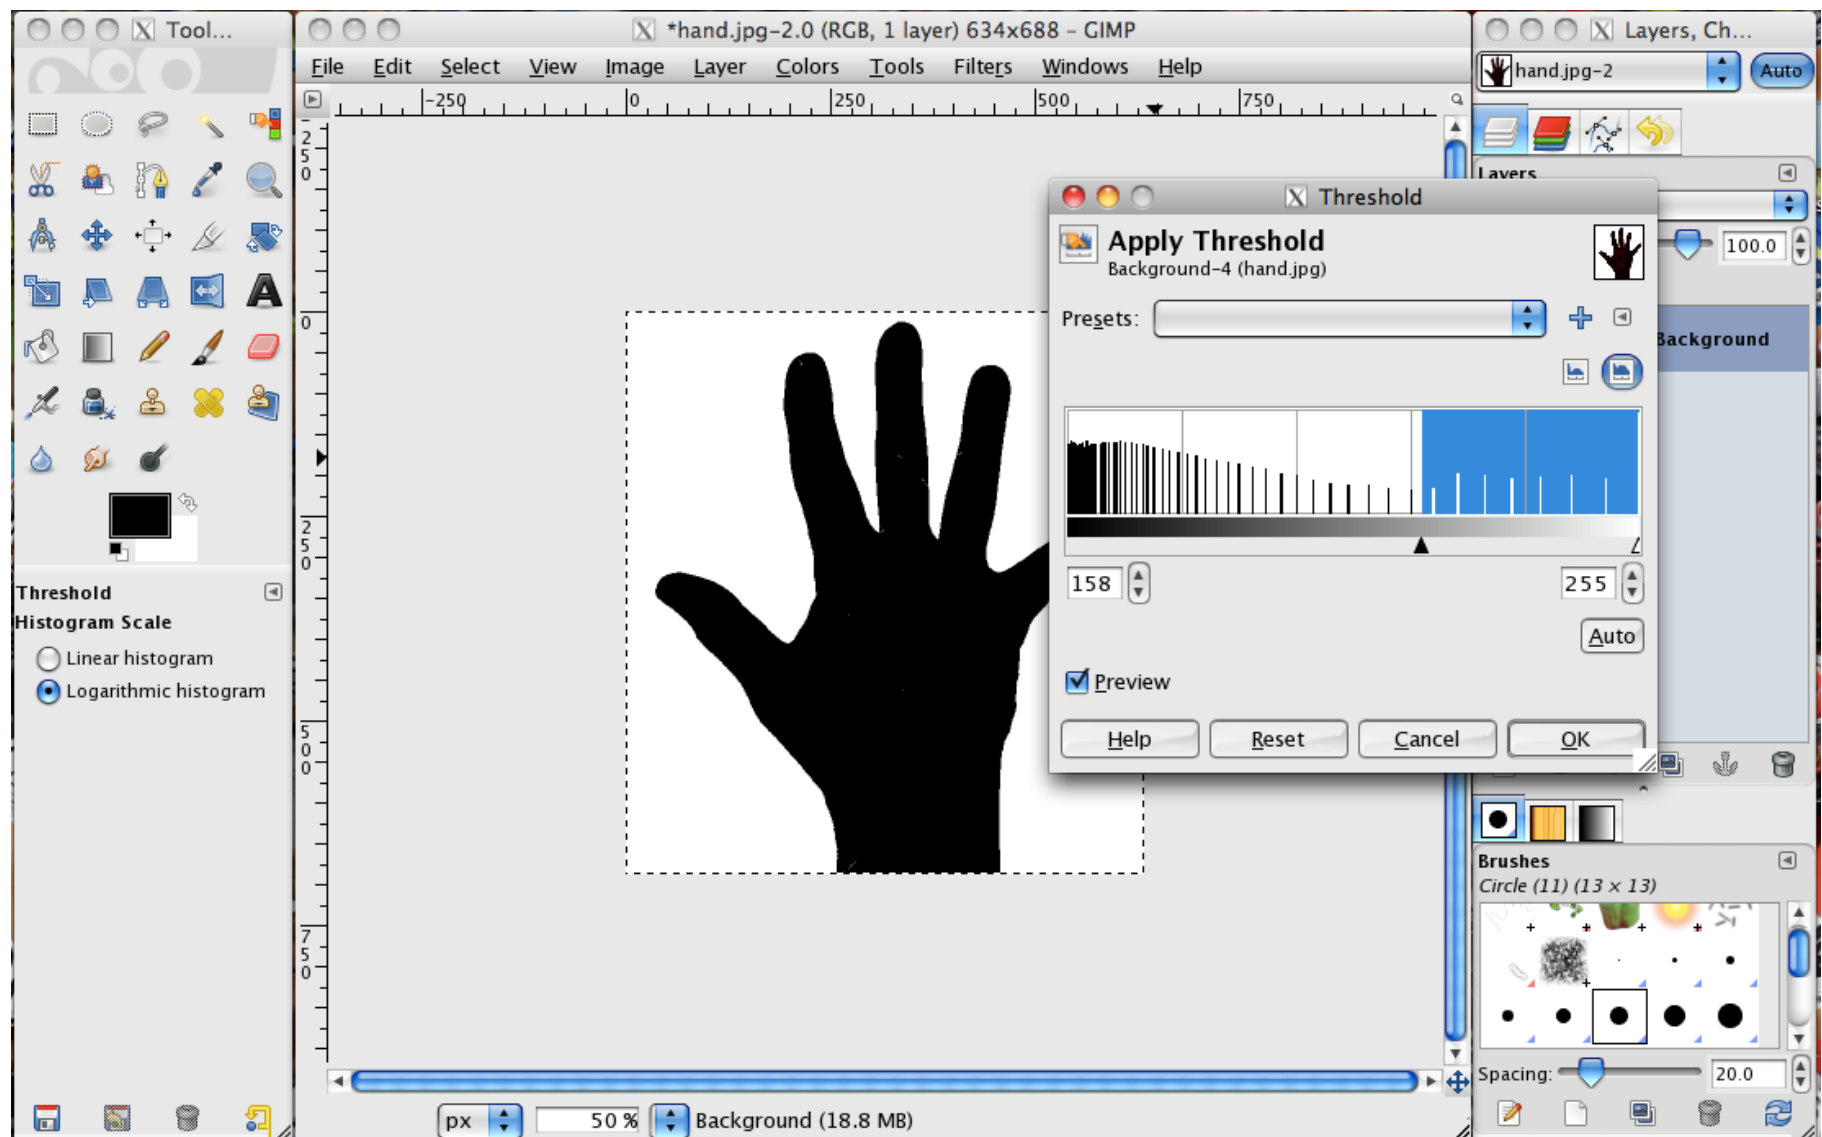

**Supplementary Figure 7.** STEP 3b: Move the histogram sliders so that the 2nd slider (grey) is in the notch between histogram nodes. If no notch, slide to the far right.



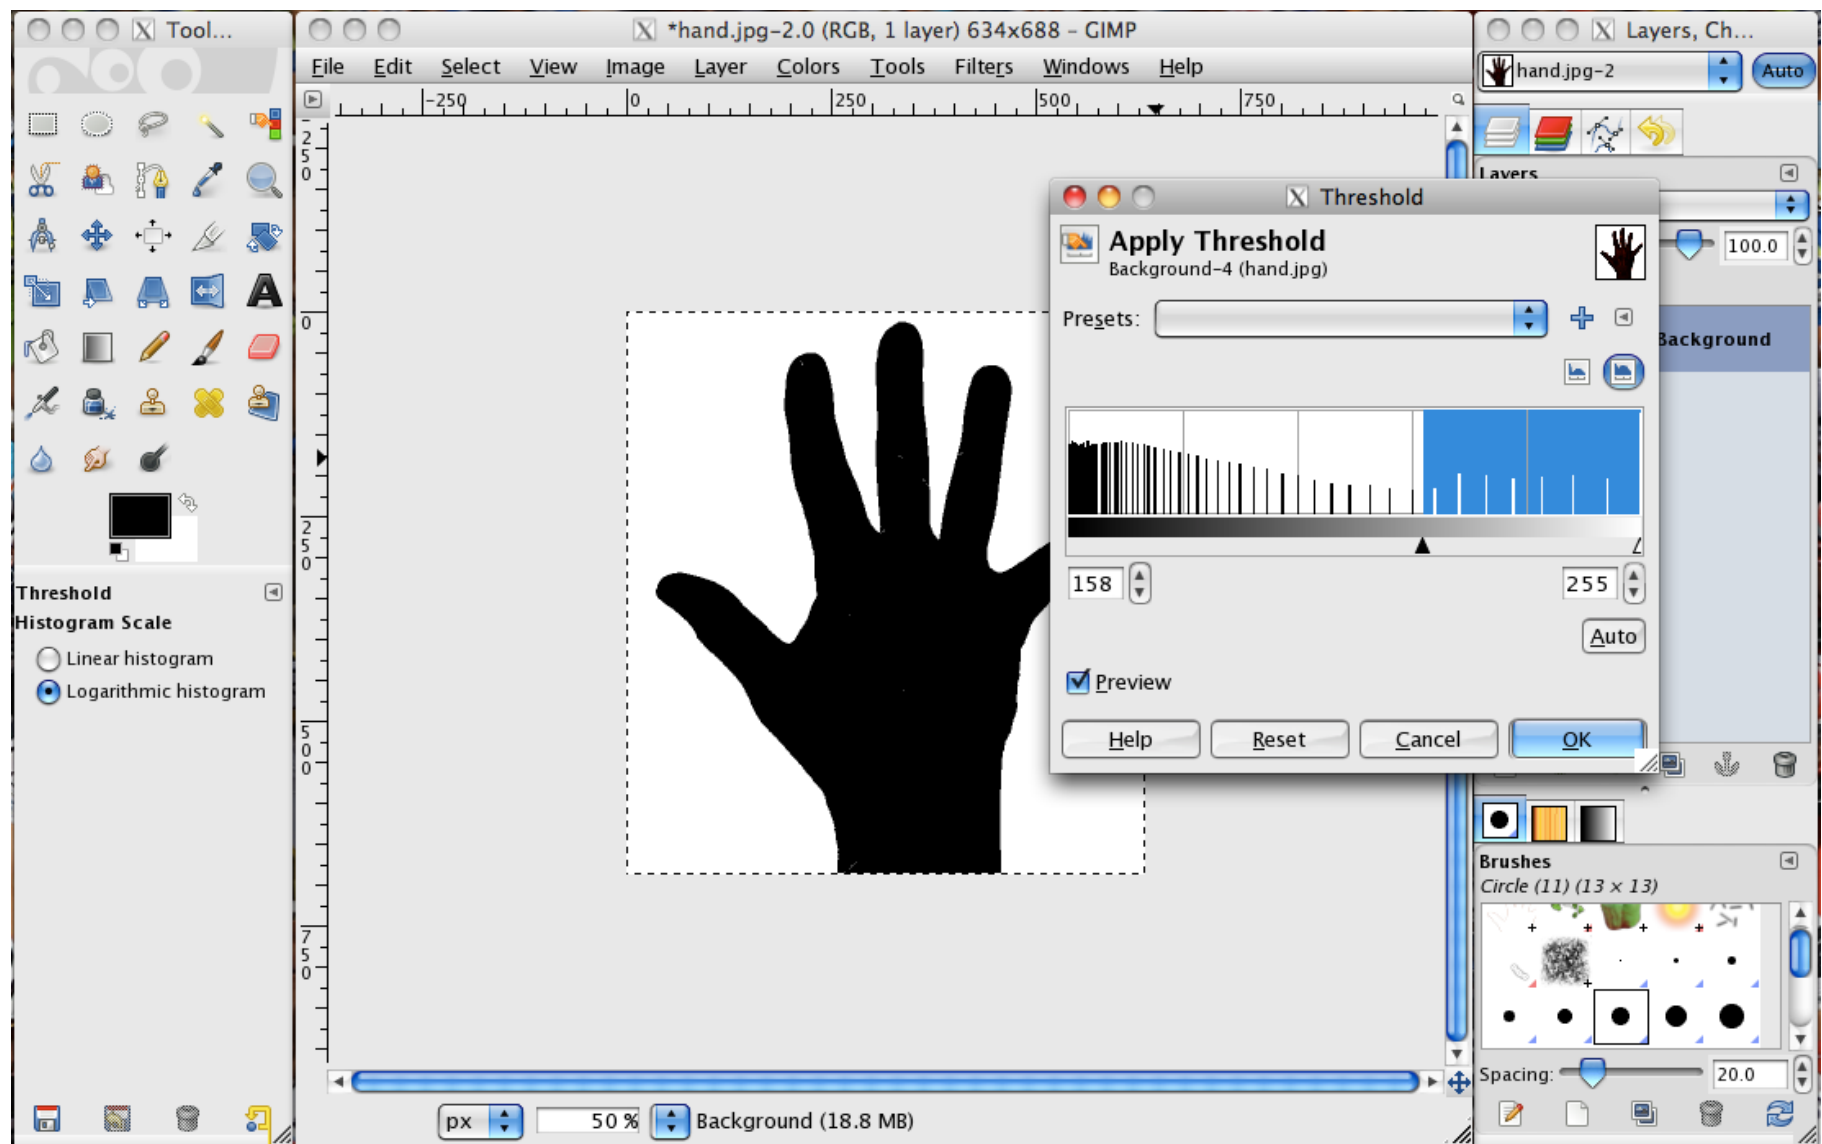

**Supplementary Figure 8. STEP 3c: Click 'OK'.**

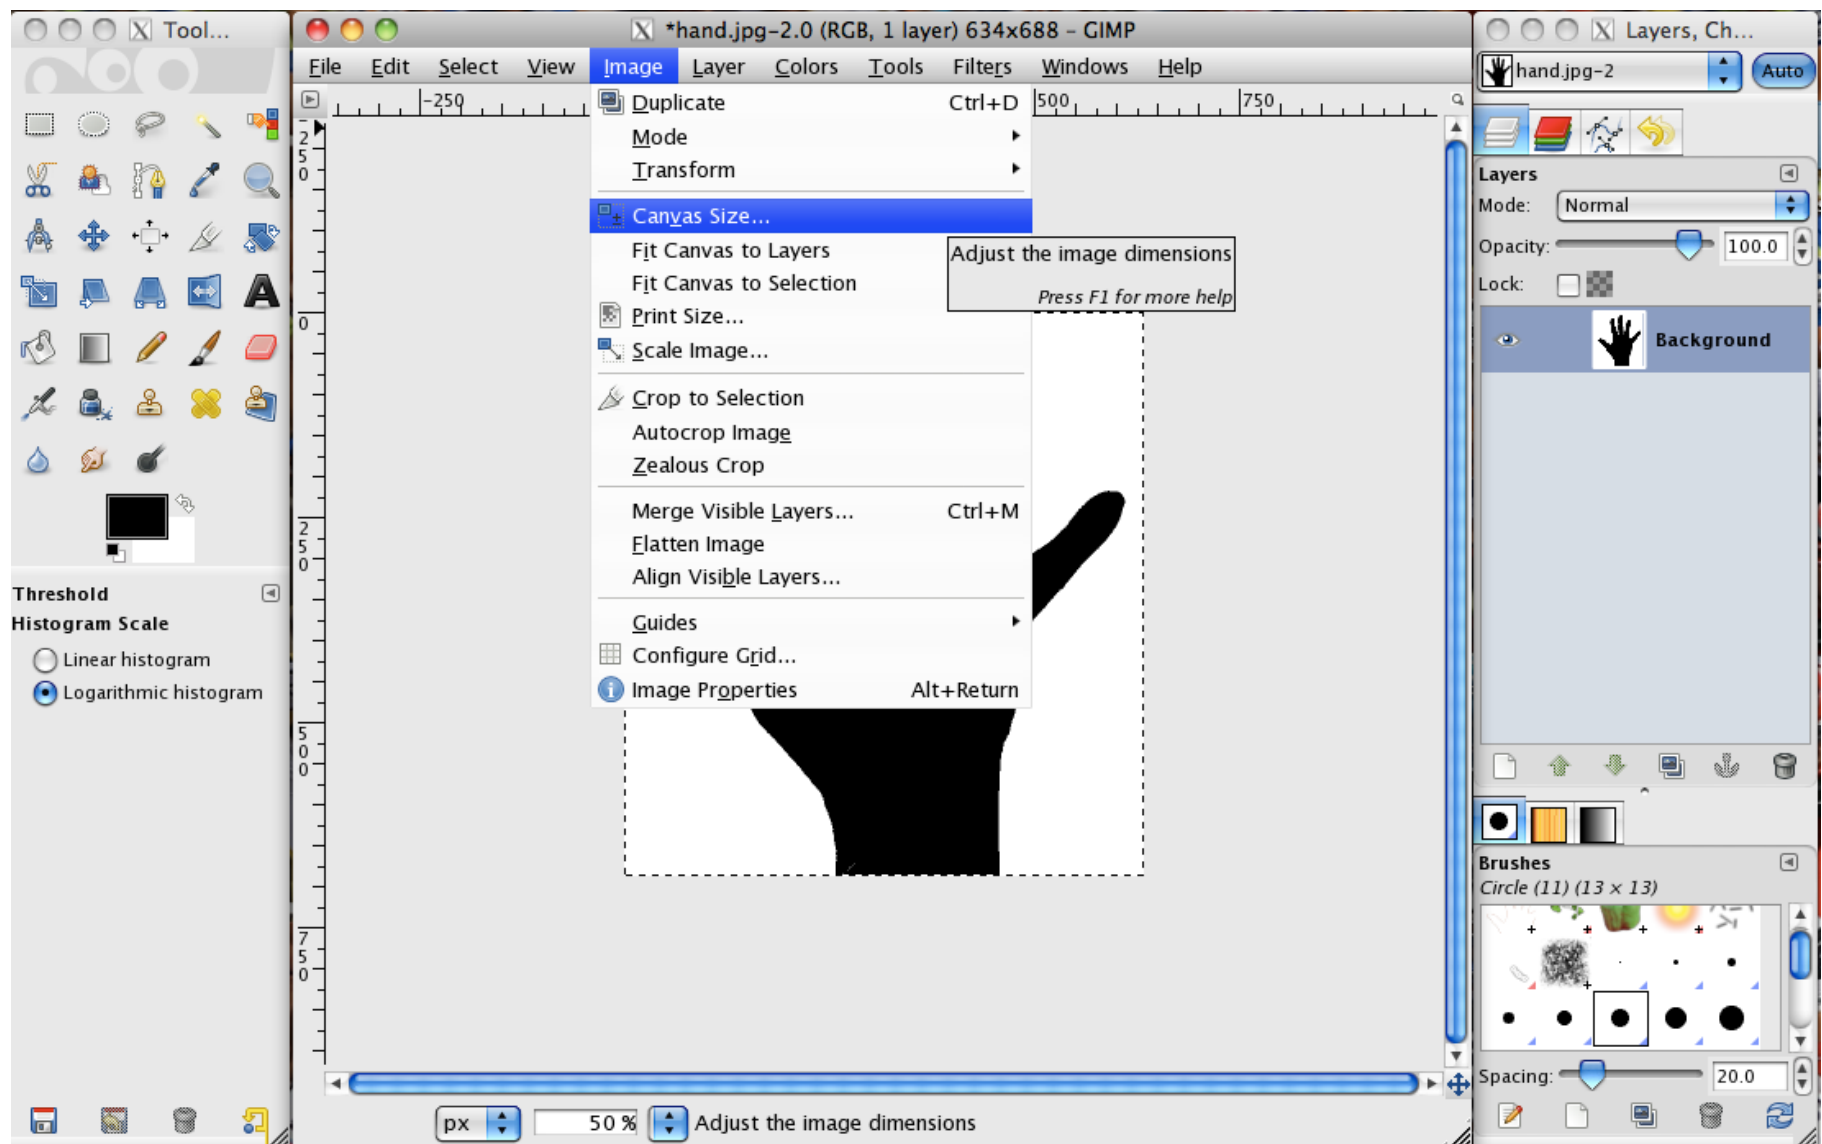

**Supplementary Figure 9.** STEP 4a: Access the canvas size tool from Image > Canvas Size menu.

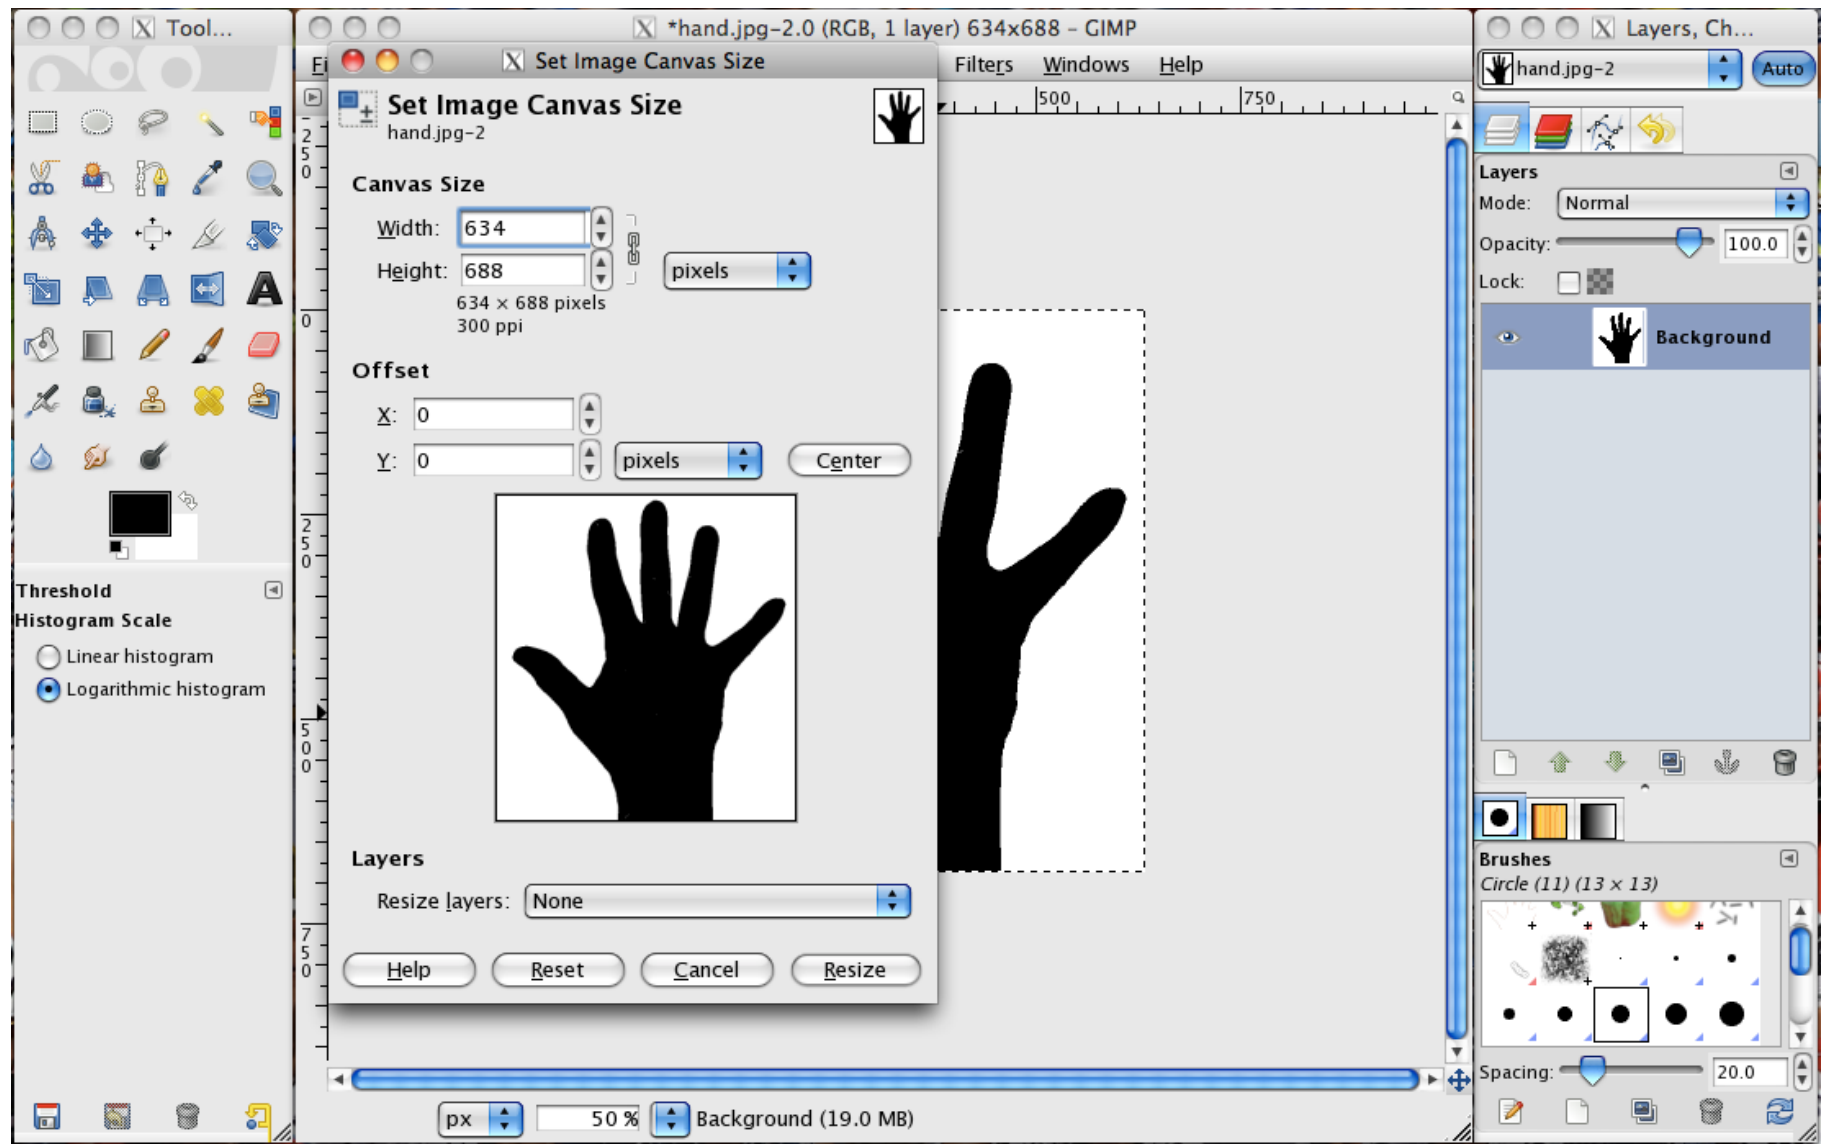

Supplementary Figure 20. STEP 4b: The Canvas Size tool.

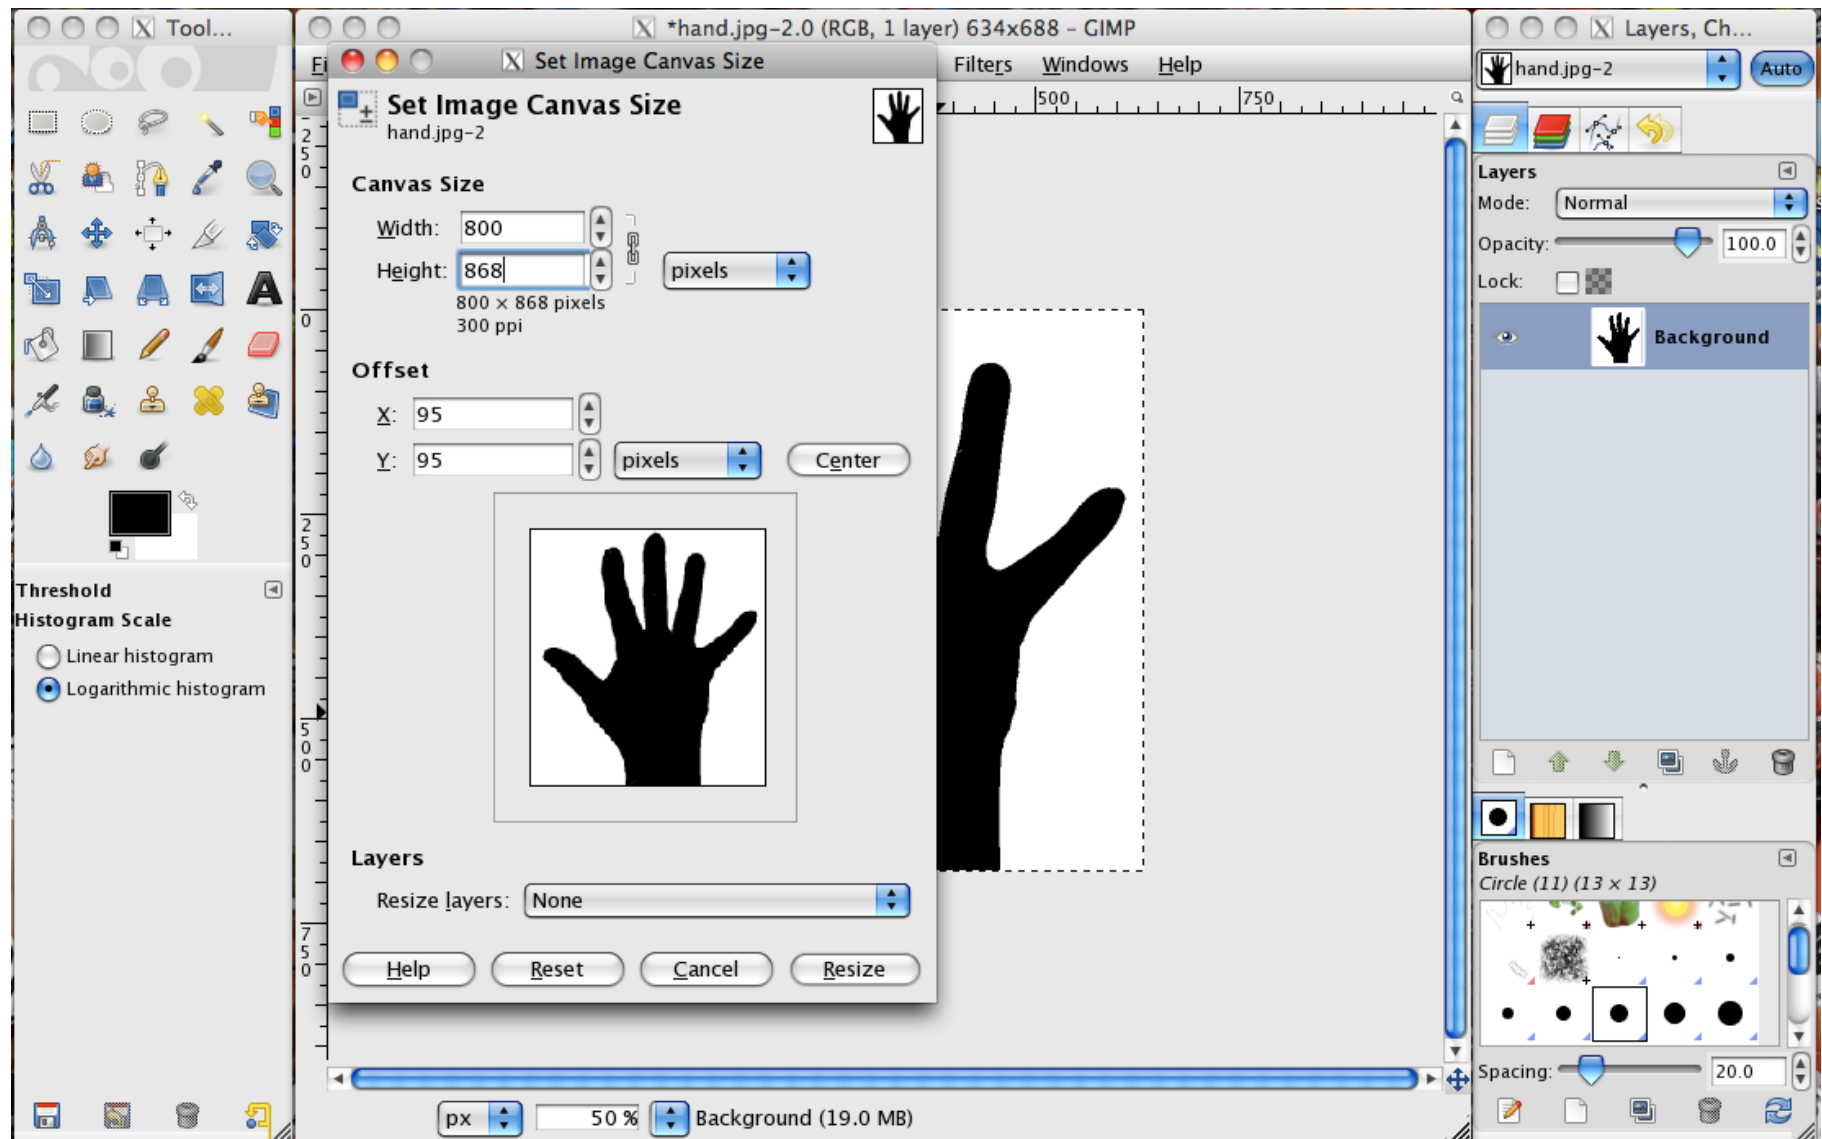

**Supplementary Figure 31.** STEP 4c: Increase the canvas size to an arbitrarily large size; utilize the offset to place the current image in the center of the canvas.

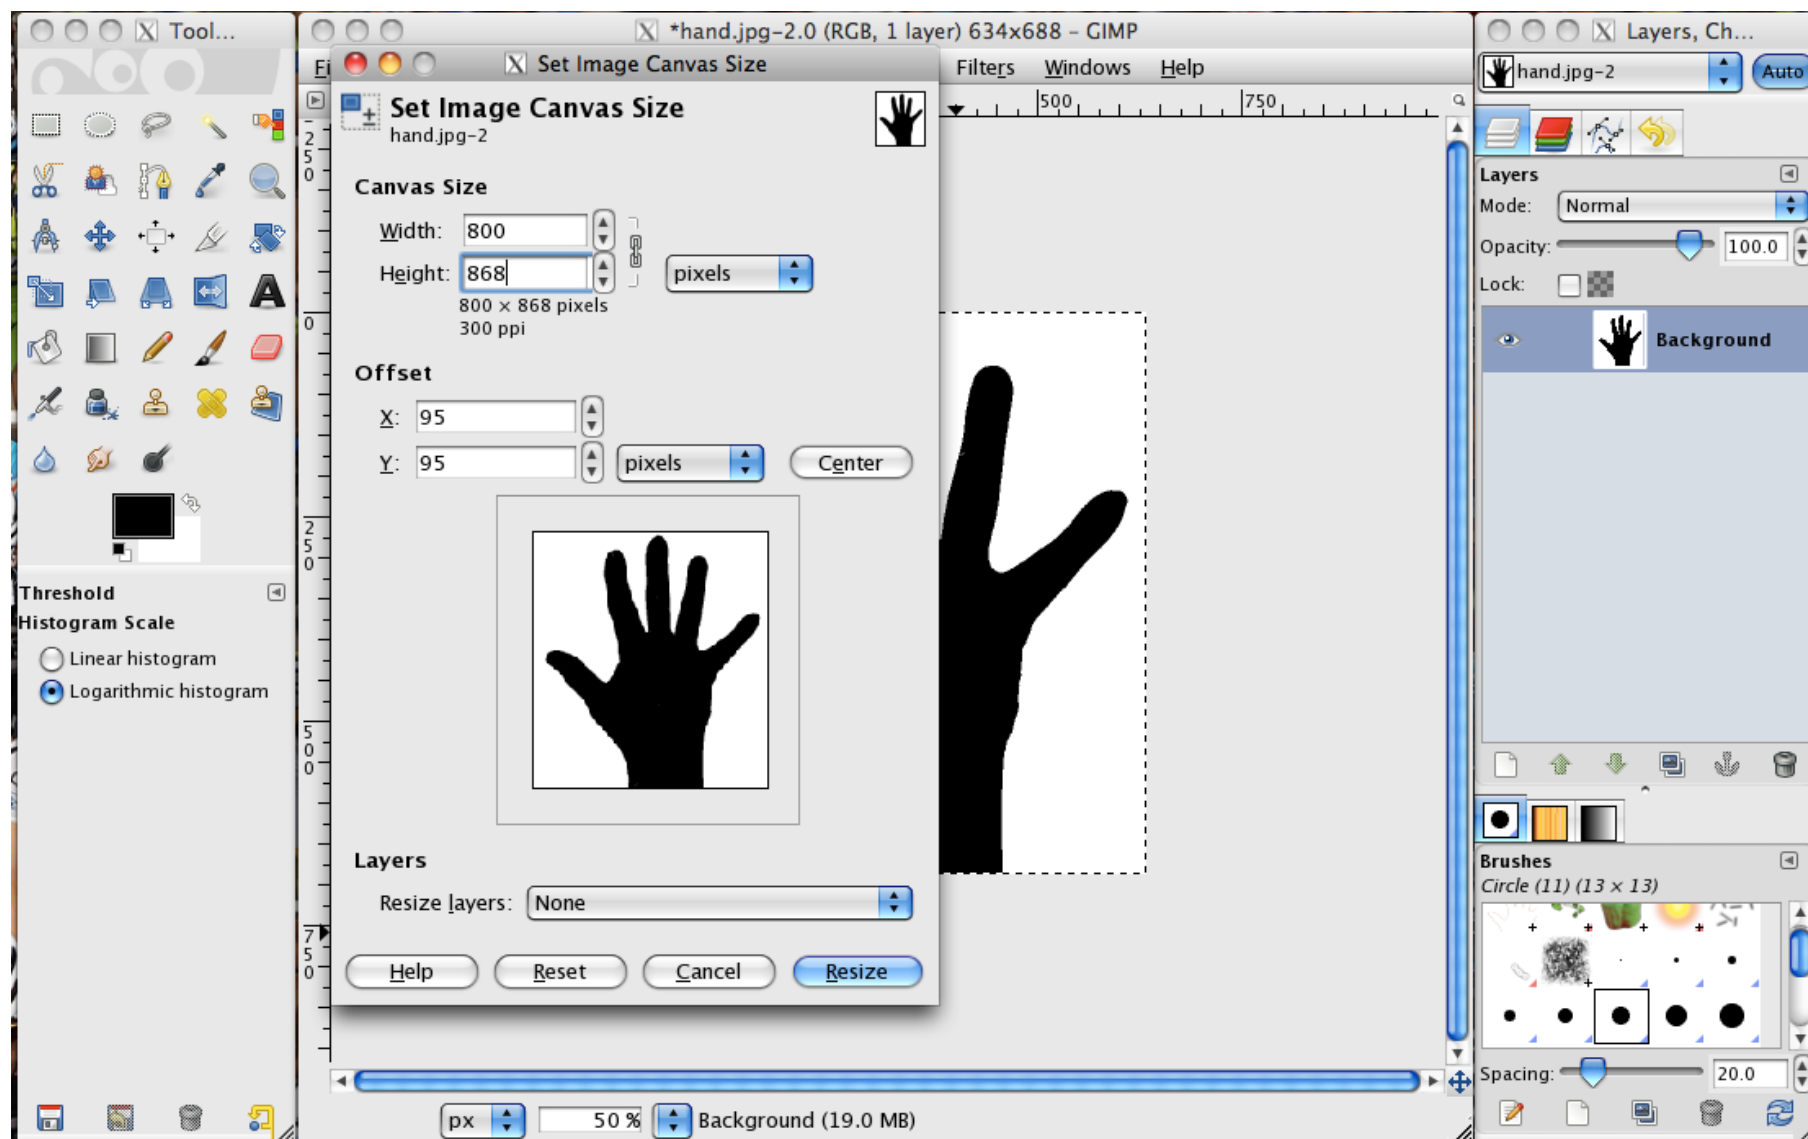

Supplementary Figure 42. STEP 4d: Click 'OK'.



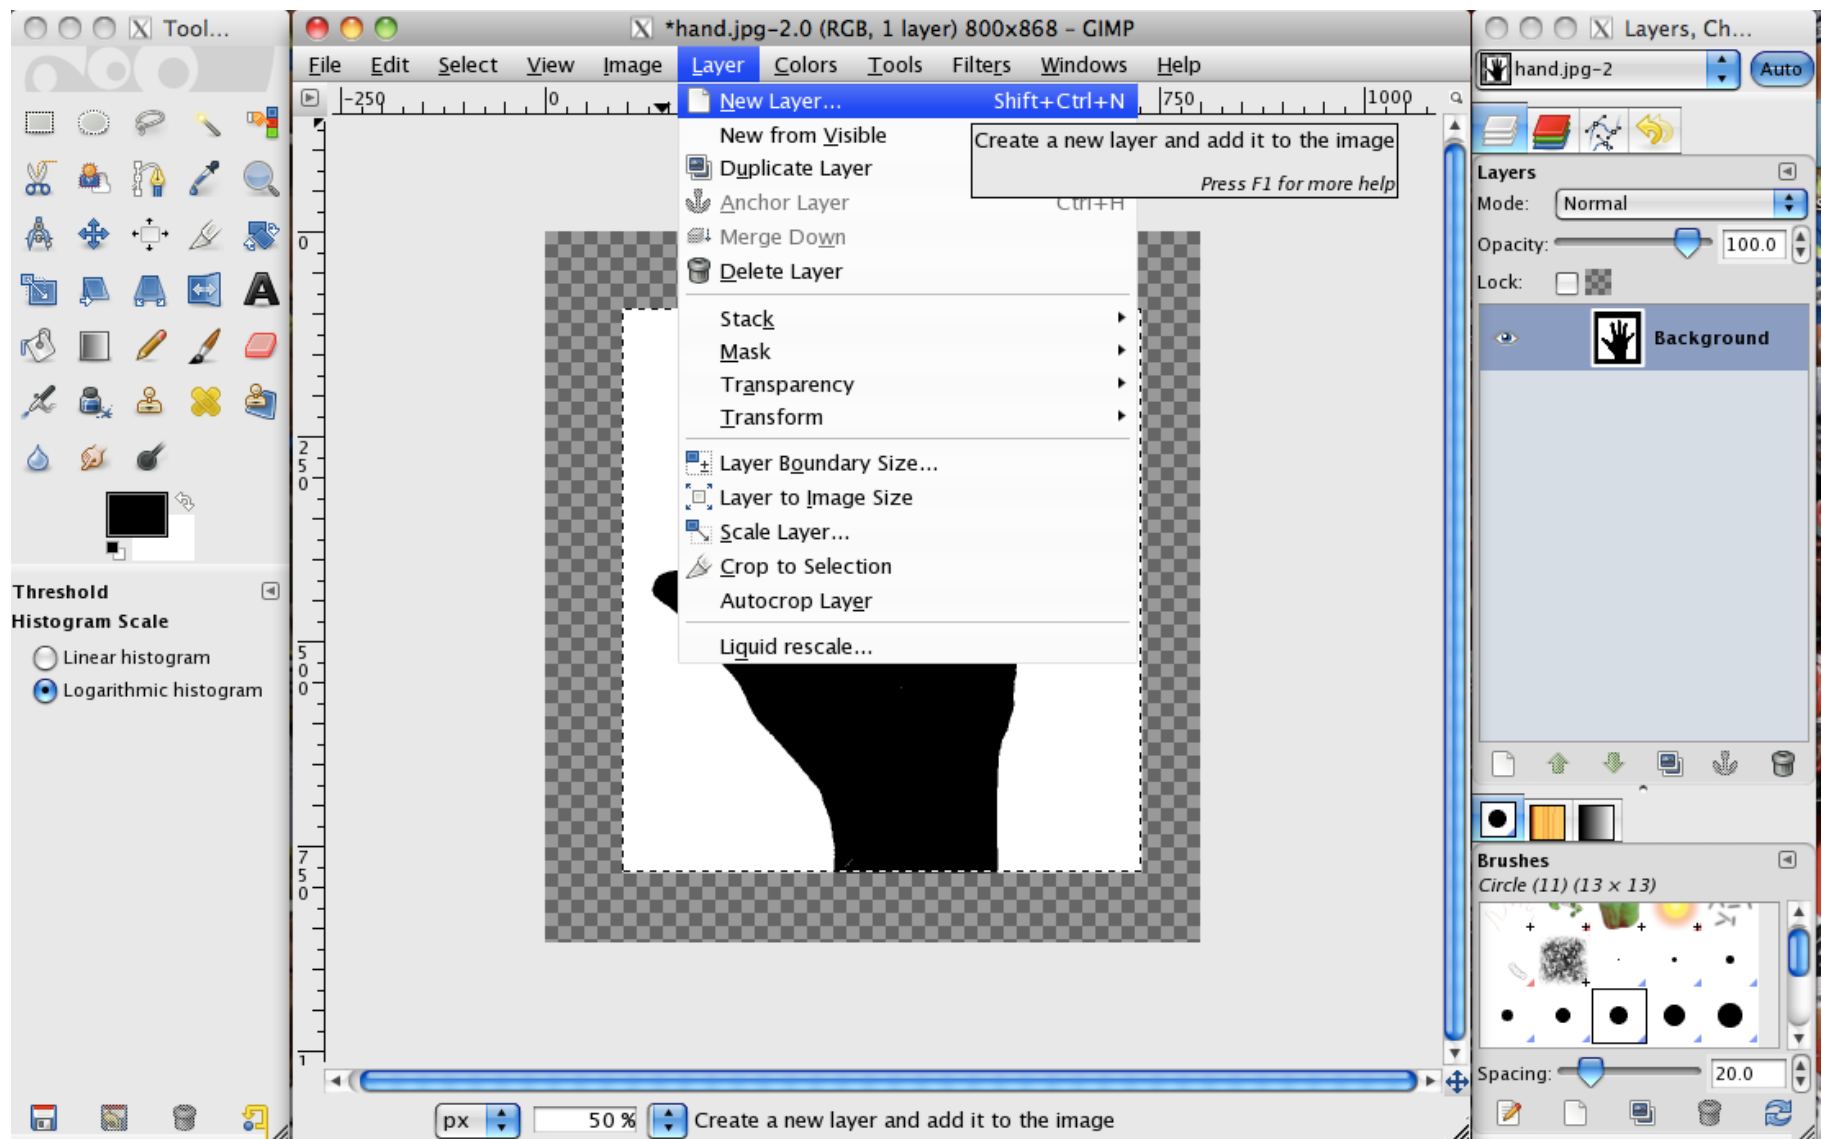

Supplementary Figure 53. STEP 4e: Access the New Layer tool via Layer > New Layer.

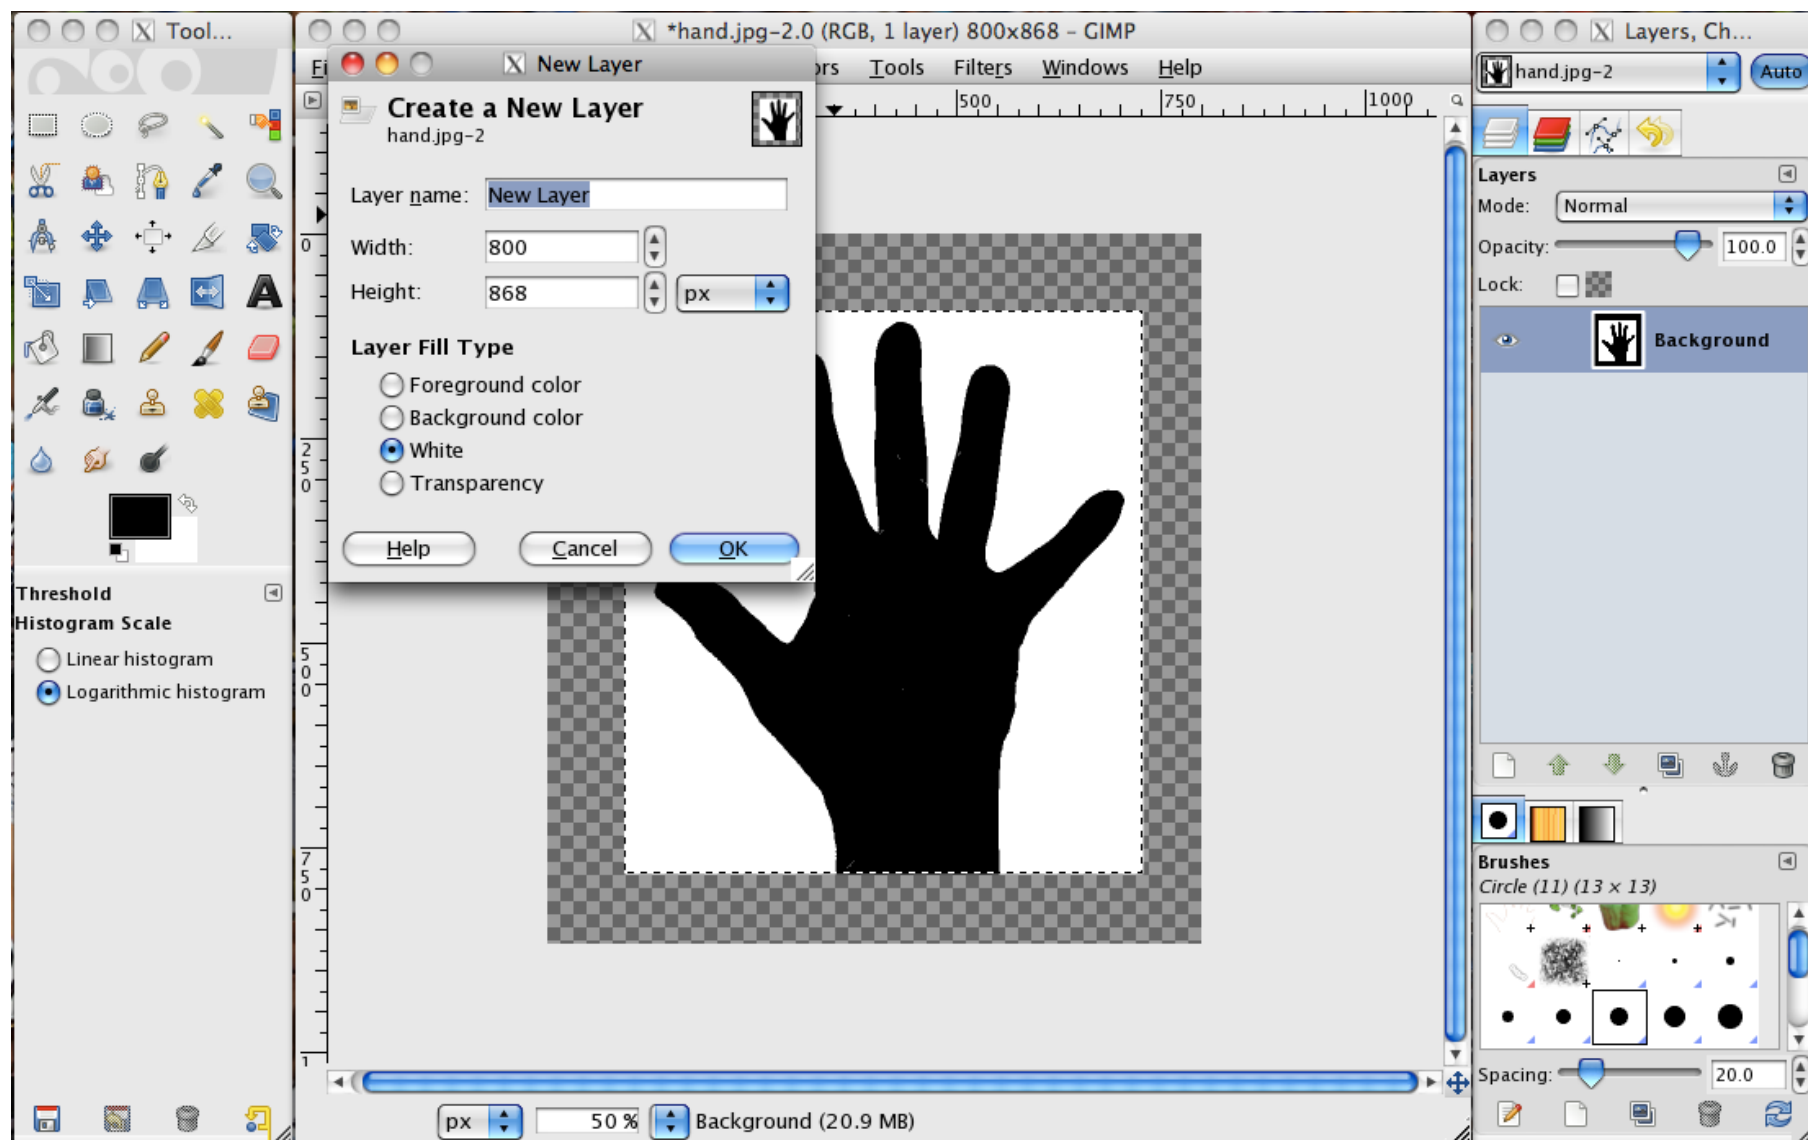

**Supplementary Figure 64.** STEP 4f: Create a new White Layer; Click 'OK'.

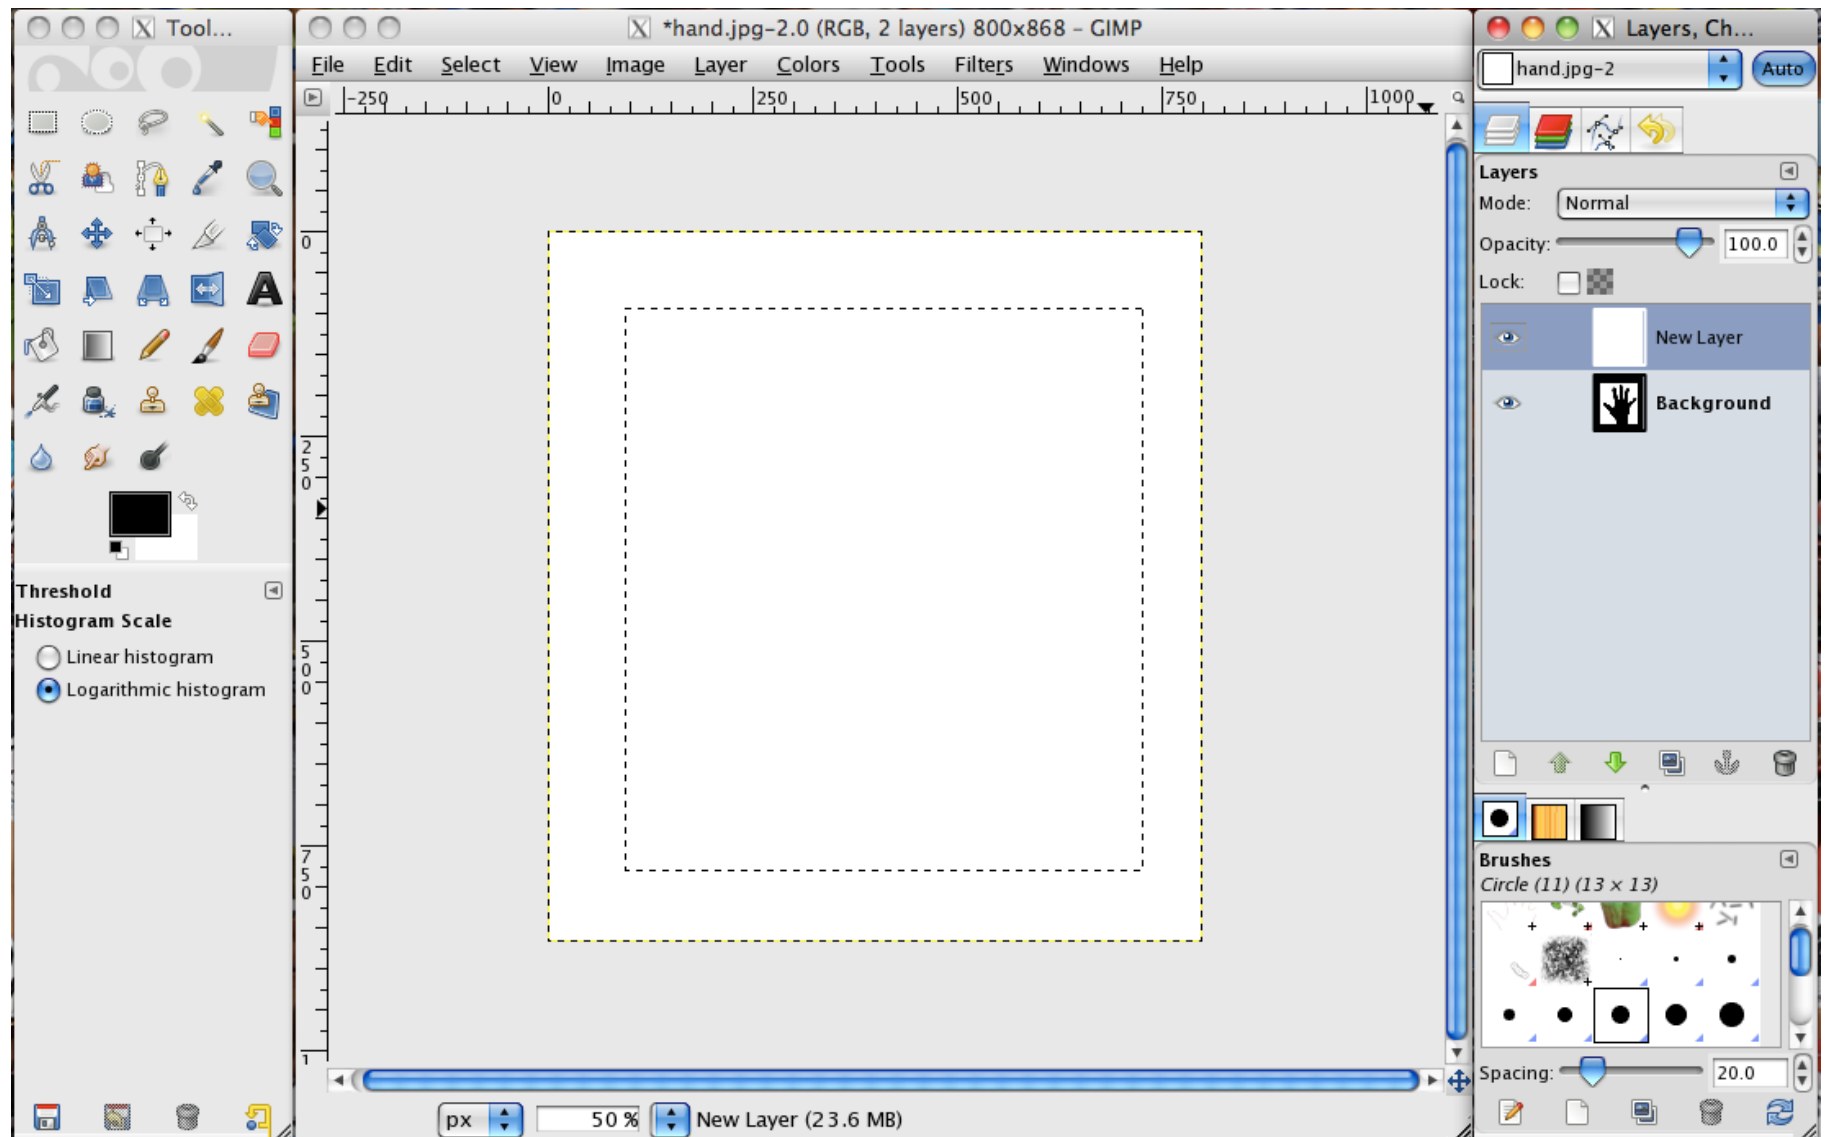

**Supplementary Figure 75.** STEP 4f: Layer will appear by default on top of the existing hand layer (notice Layers menu at right).

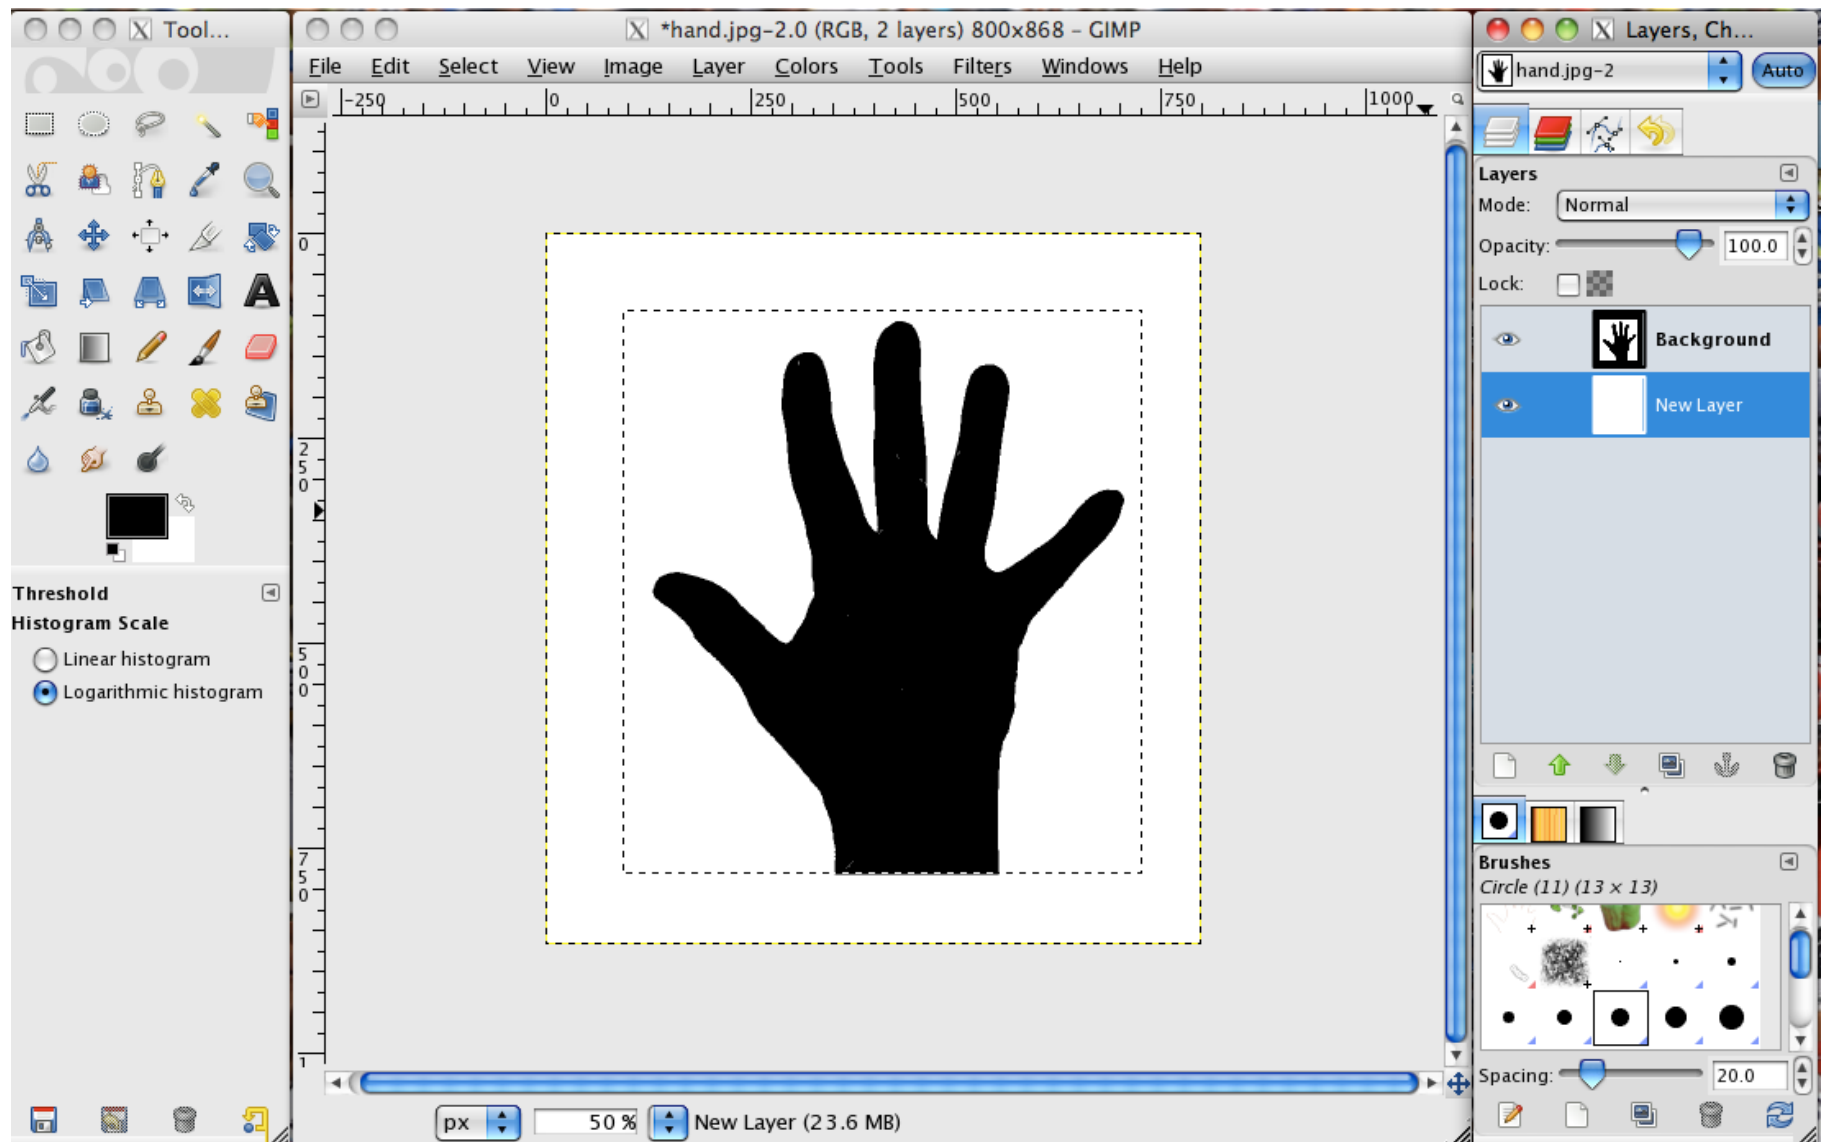

**Supplementary Figure 86.** STEP 4g: Move new white layer underneath the hand layer.

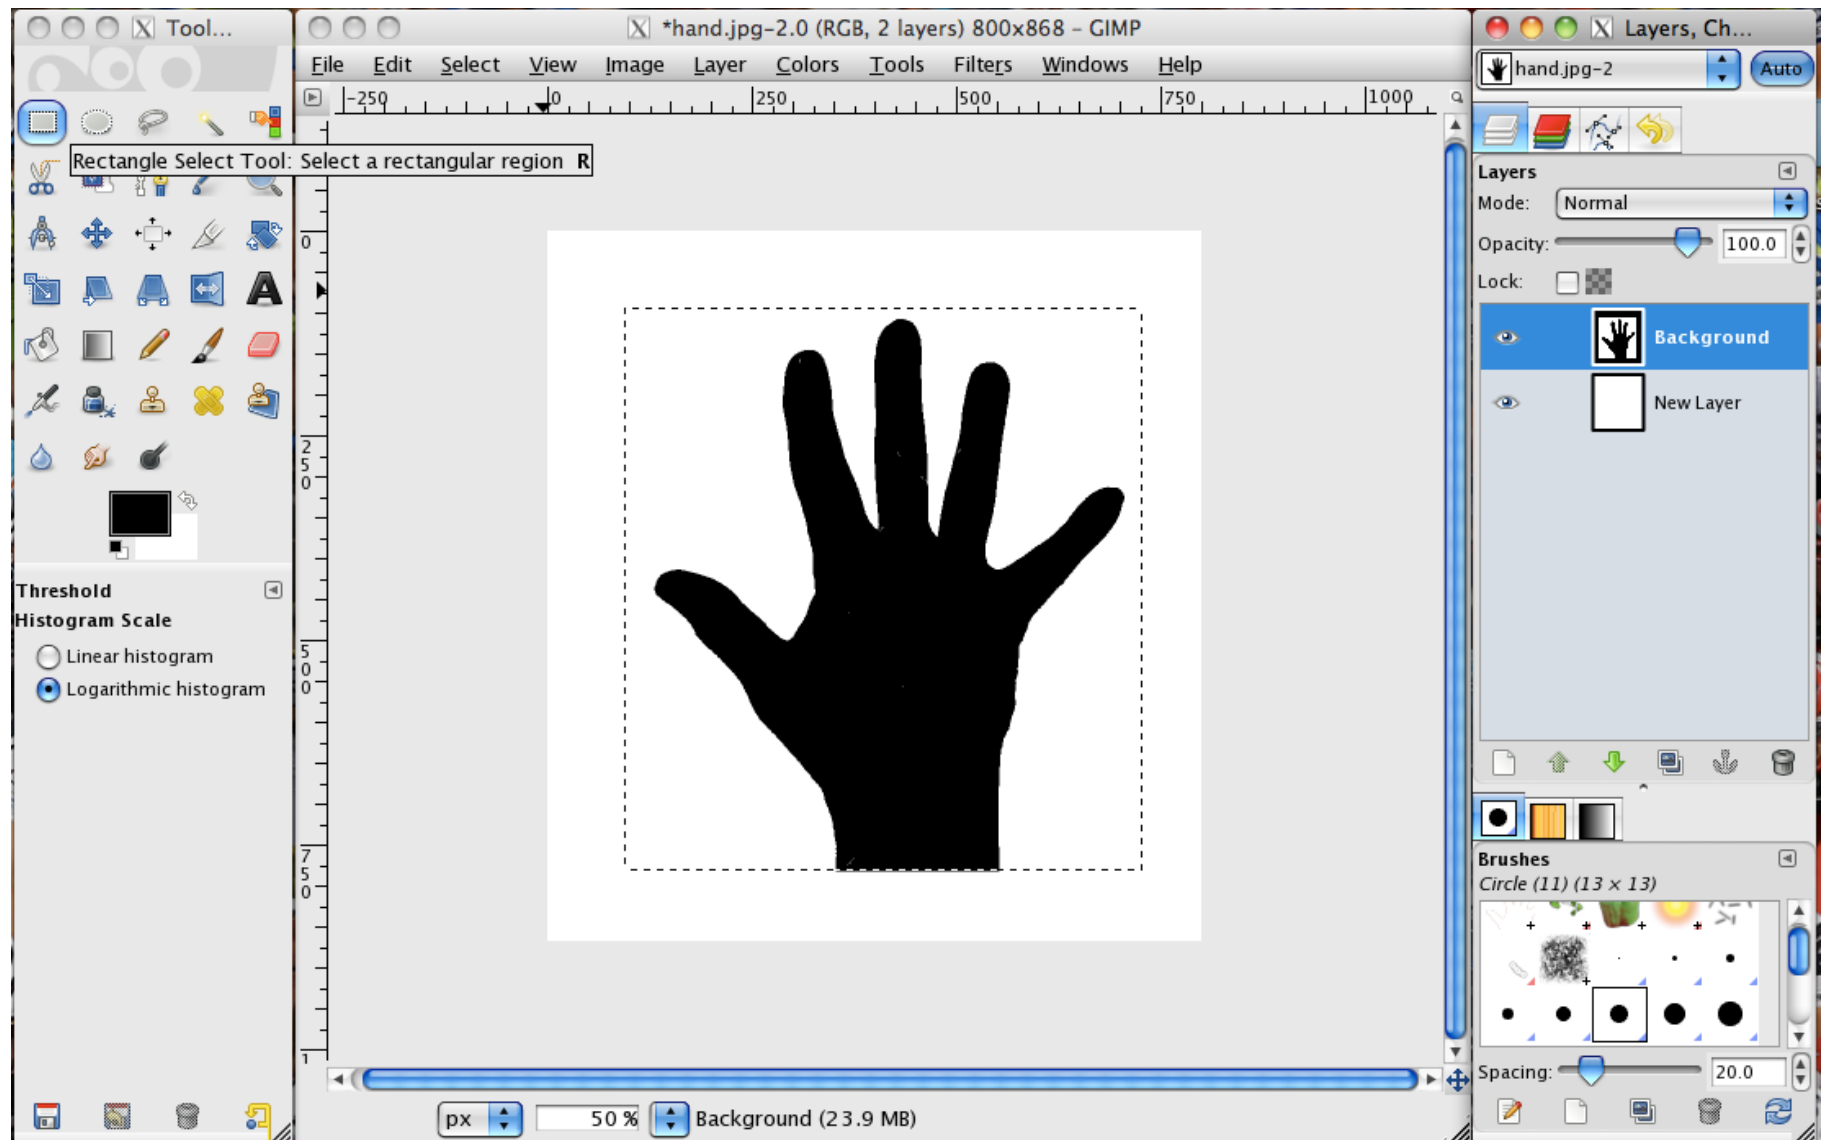

**Supplementary Figure 97.** STEP 4h: Access the Rectangle Select Tool from the Tool menu at left.



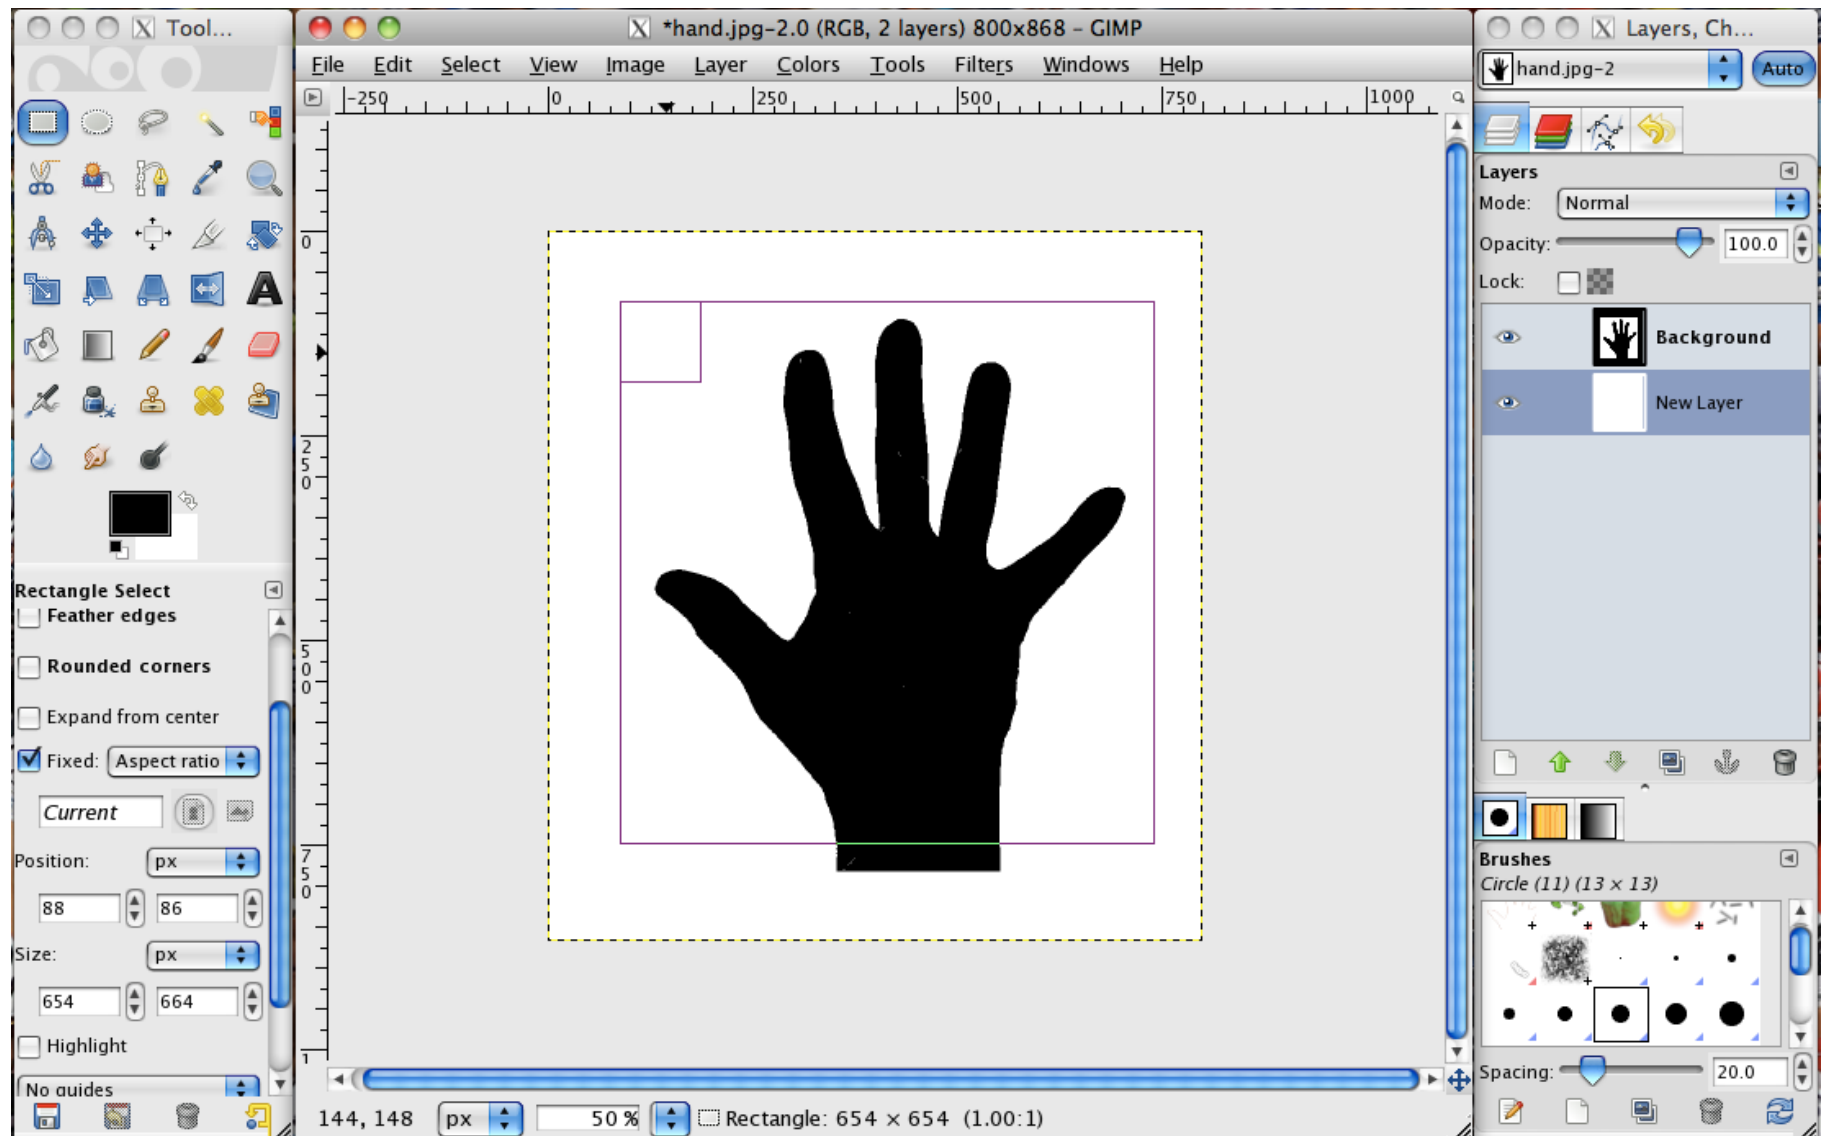

**Supplementary Figure 108.** STEP 4i: Drag a square section: Size is visible at the bottom of the Tool menu (shows 654 x 664 pixels here; not quite square....)

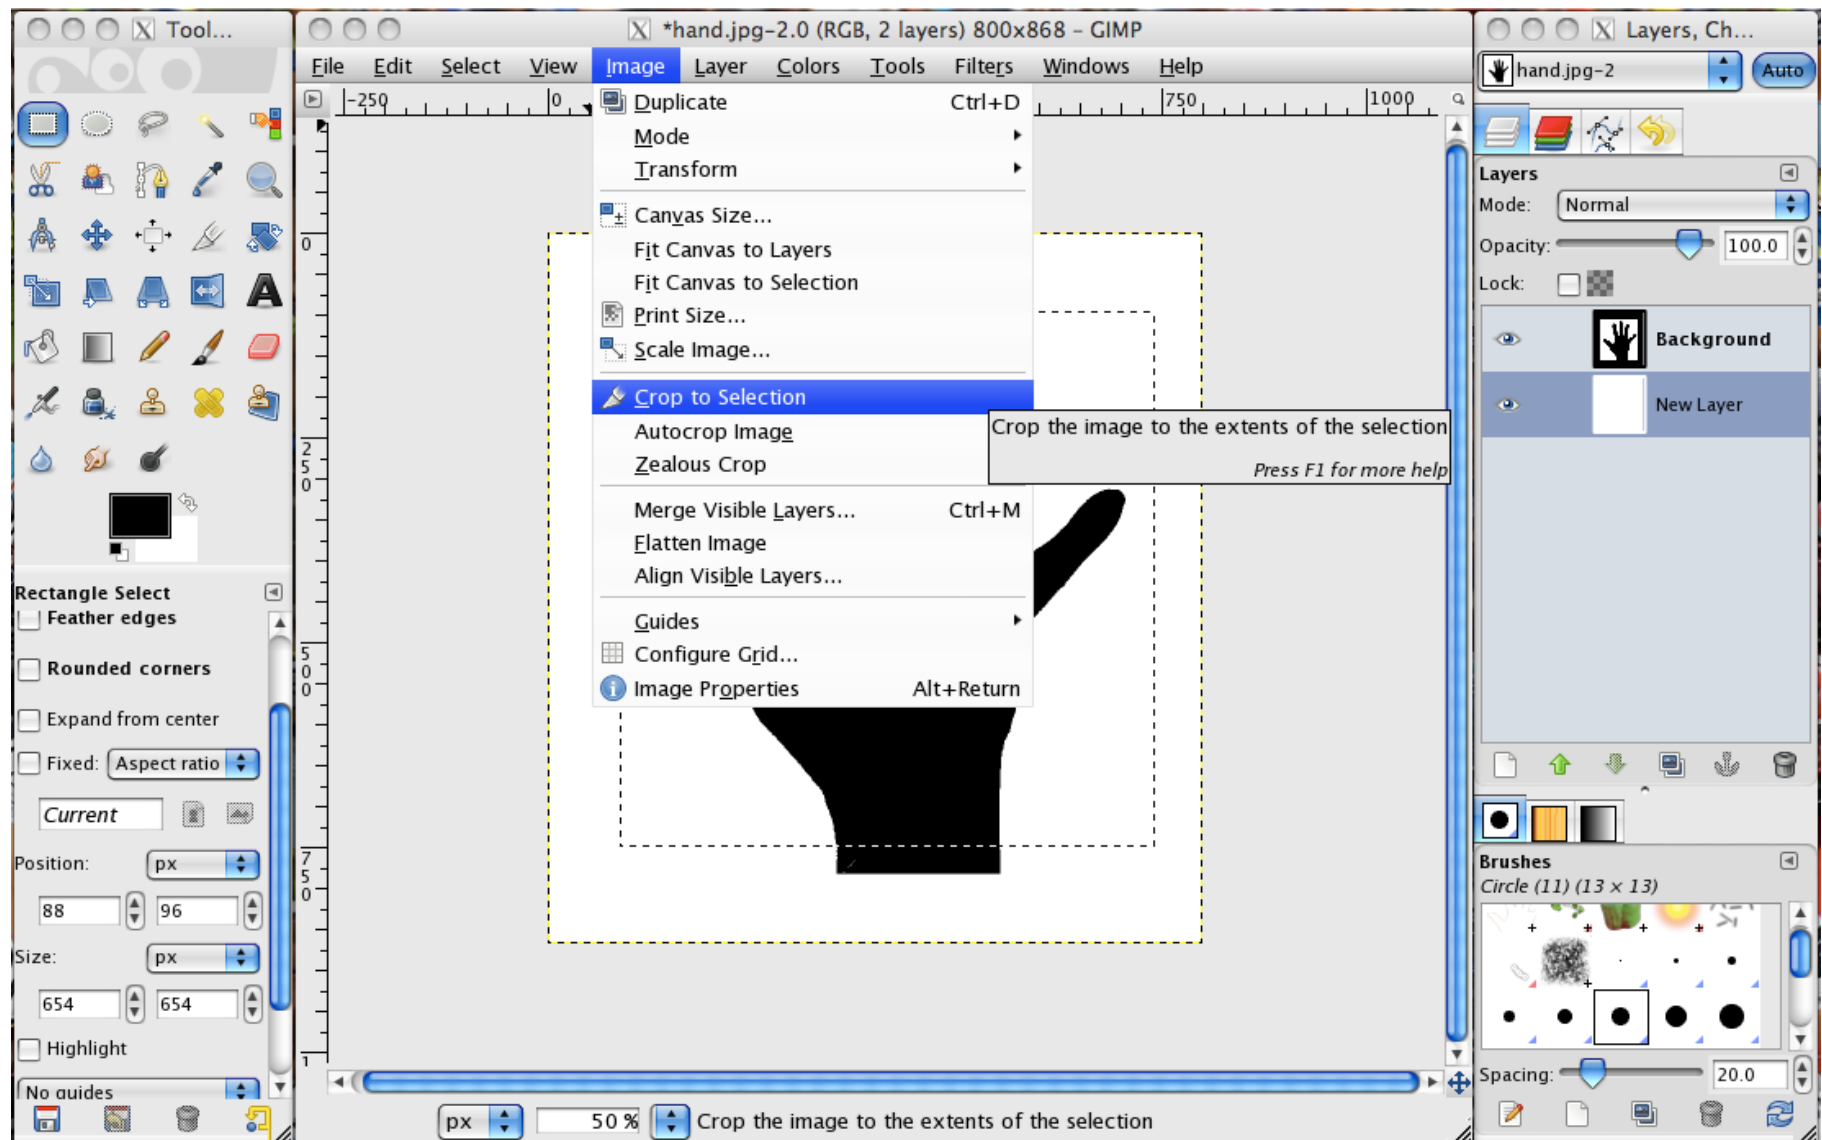

**Supplementary Figure 119. STEP 4j:** Crop to selection via Image > Crop to Selection (notice the Tool menu shows a square selection now: 654 x 654 pixels).

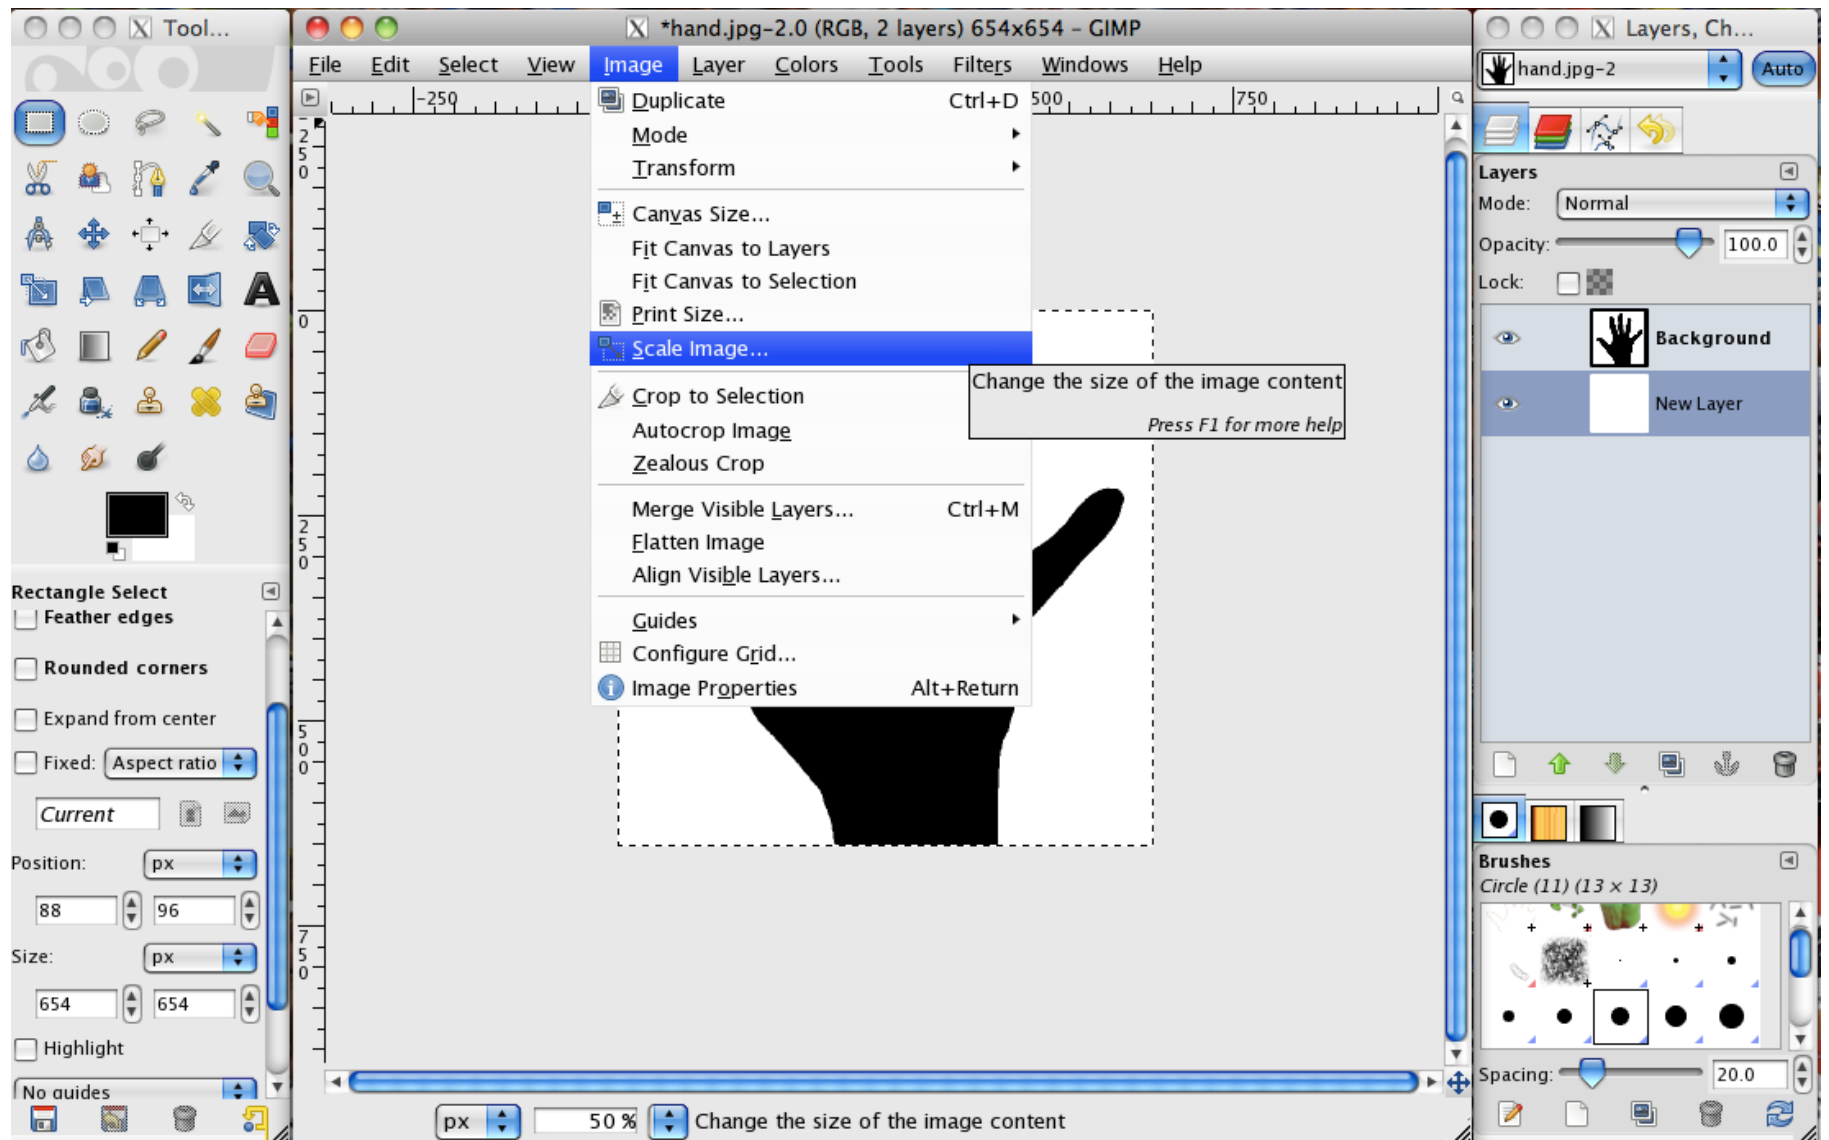

**Supplementary Figure 20.** STEP 4k: Access the image scaling tool from Image > Scale Image.

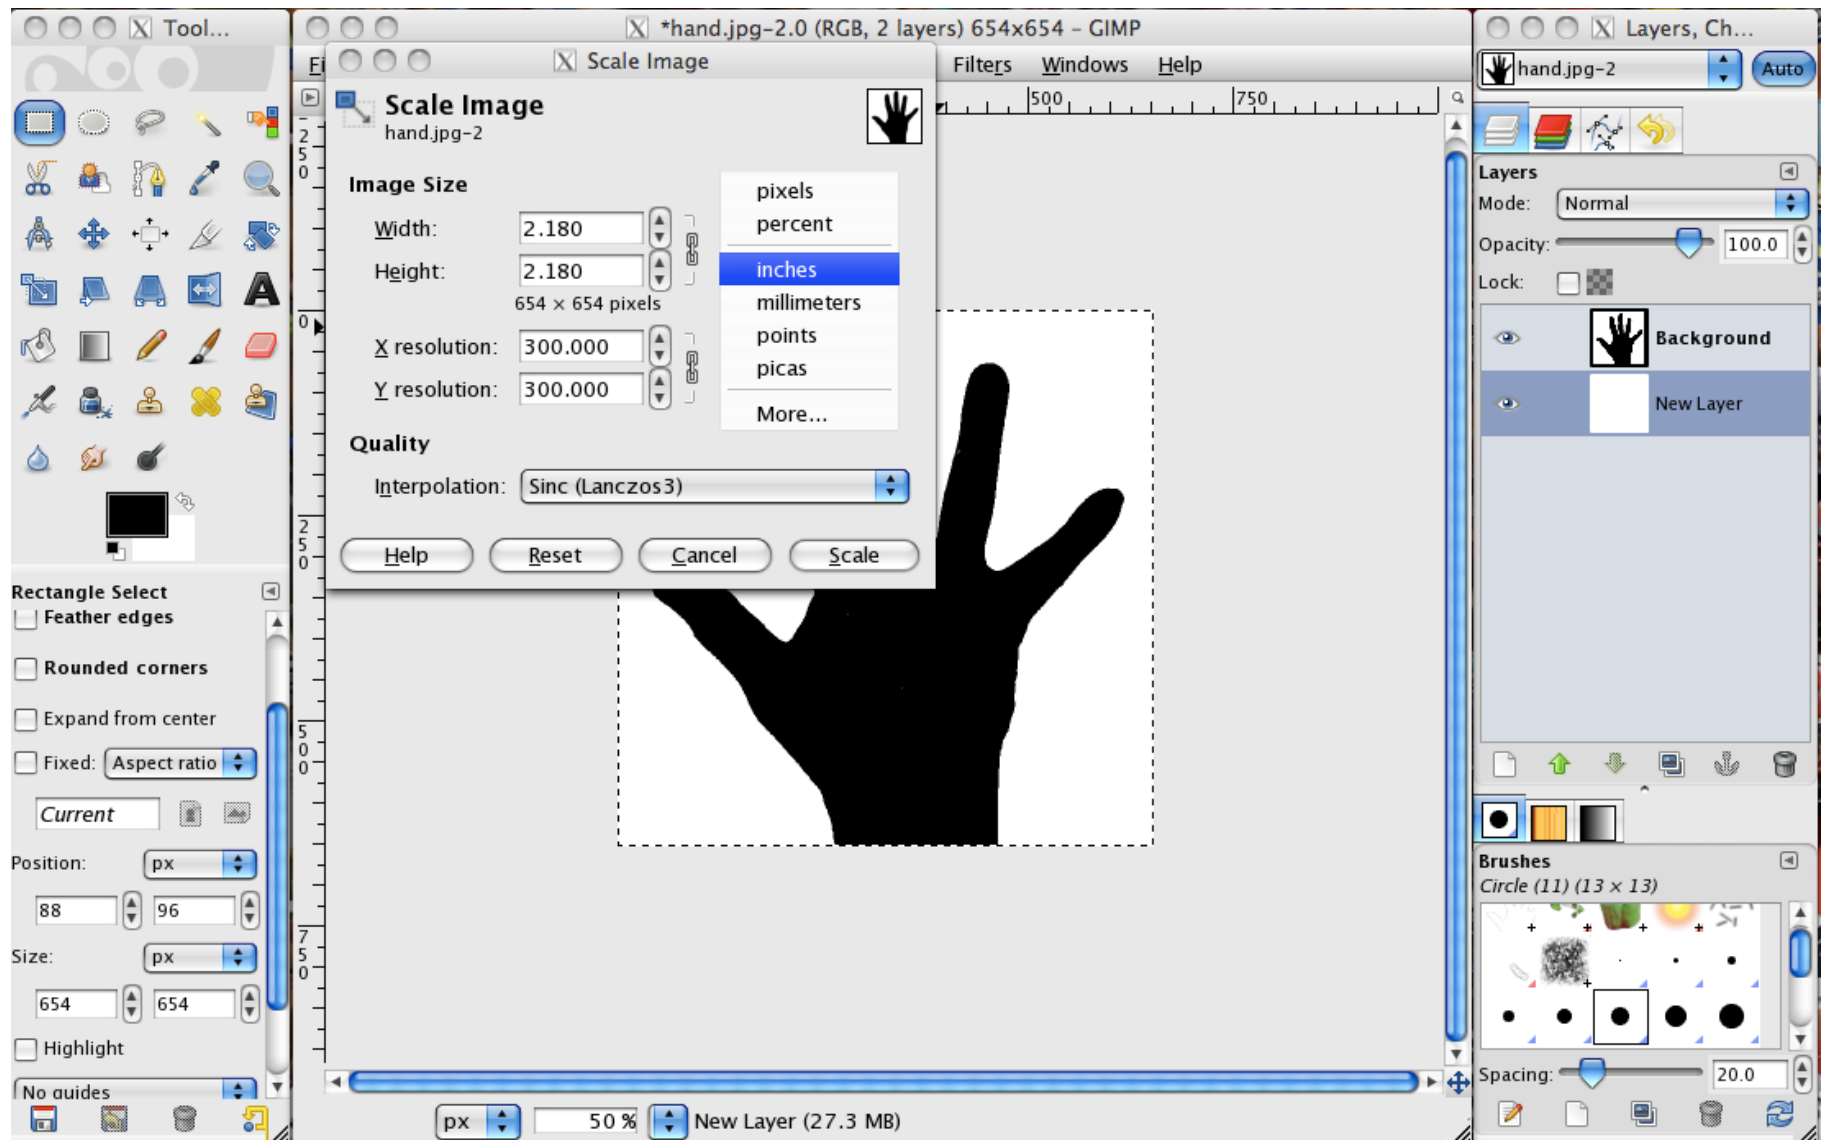

**Supplementary Figure 21.** STEP 4I: Convert units to pre-determined unit (inches selected here).

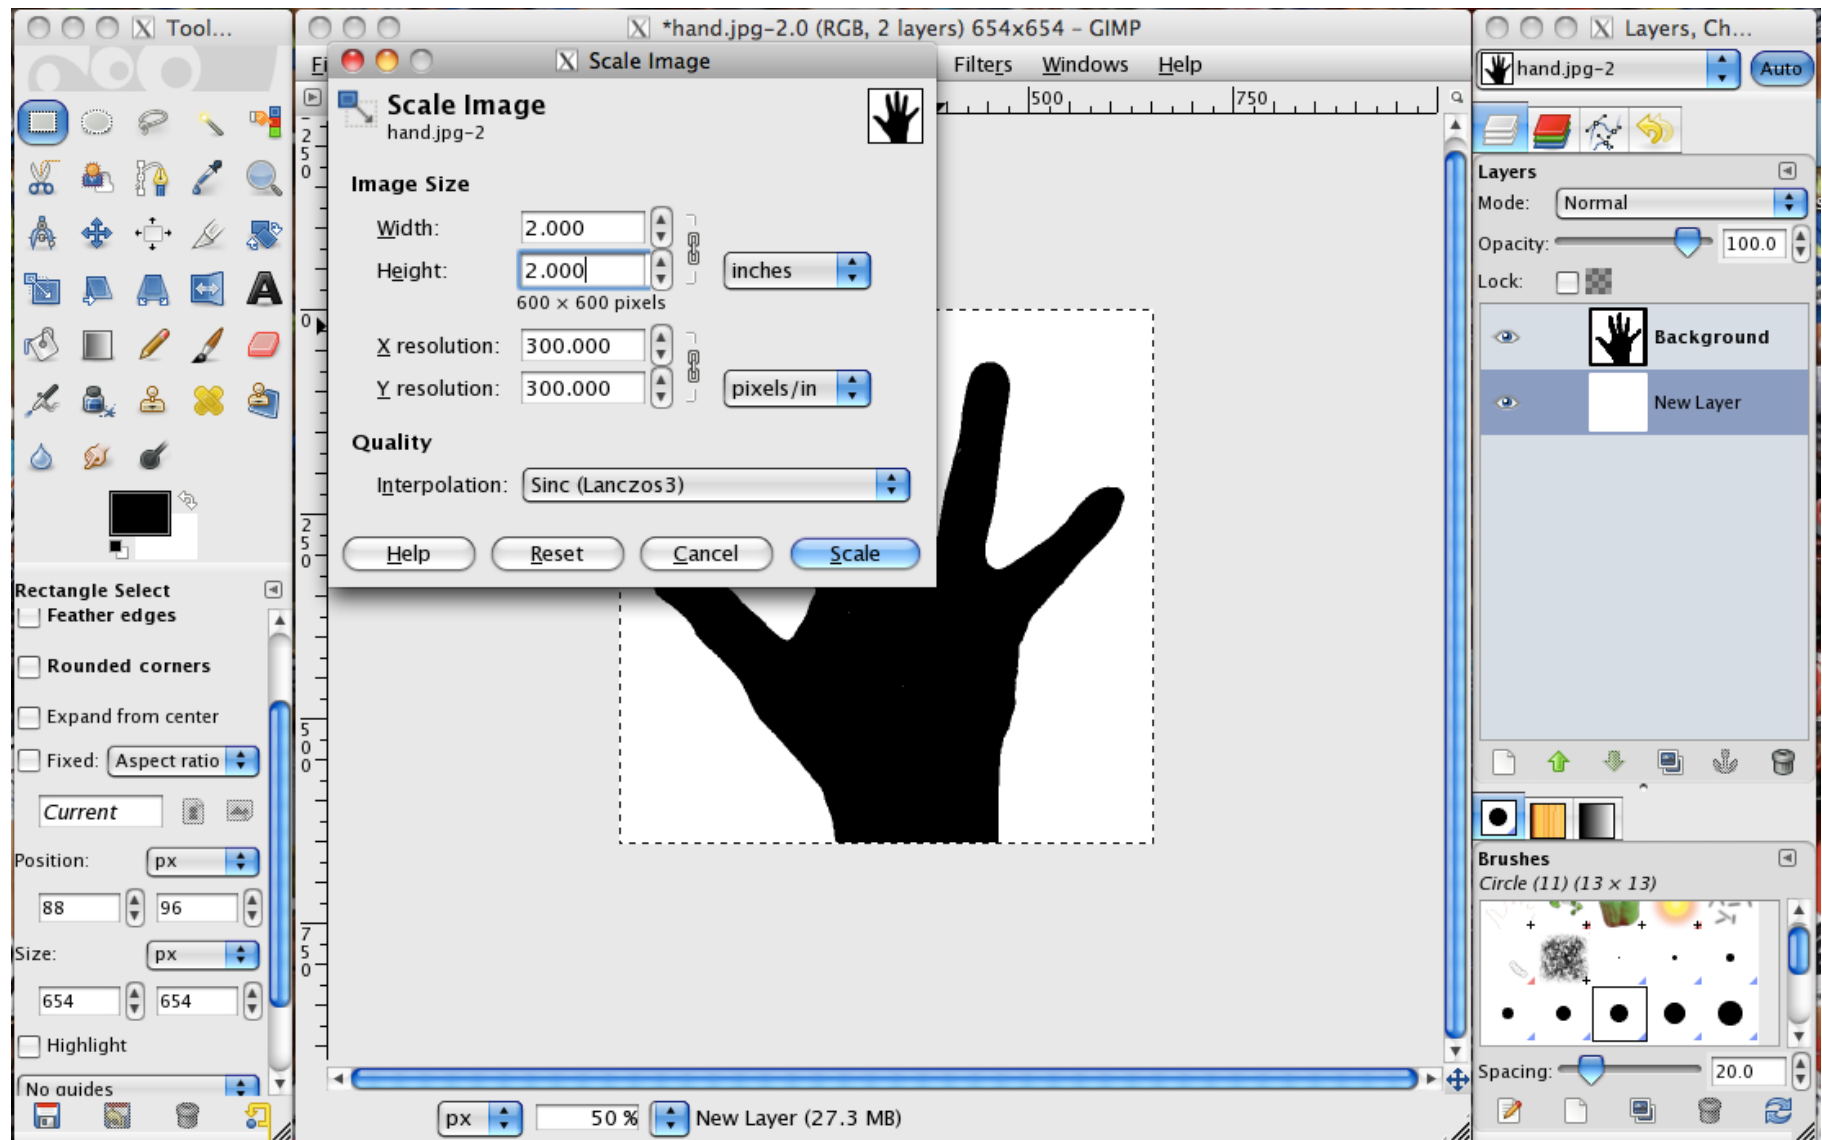

**Supplementary Figure 22.** STEP 4m: Specify size for this image to pre-determined value, here: 2 inches square. Click 'OK'.



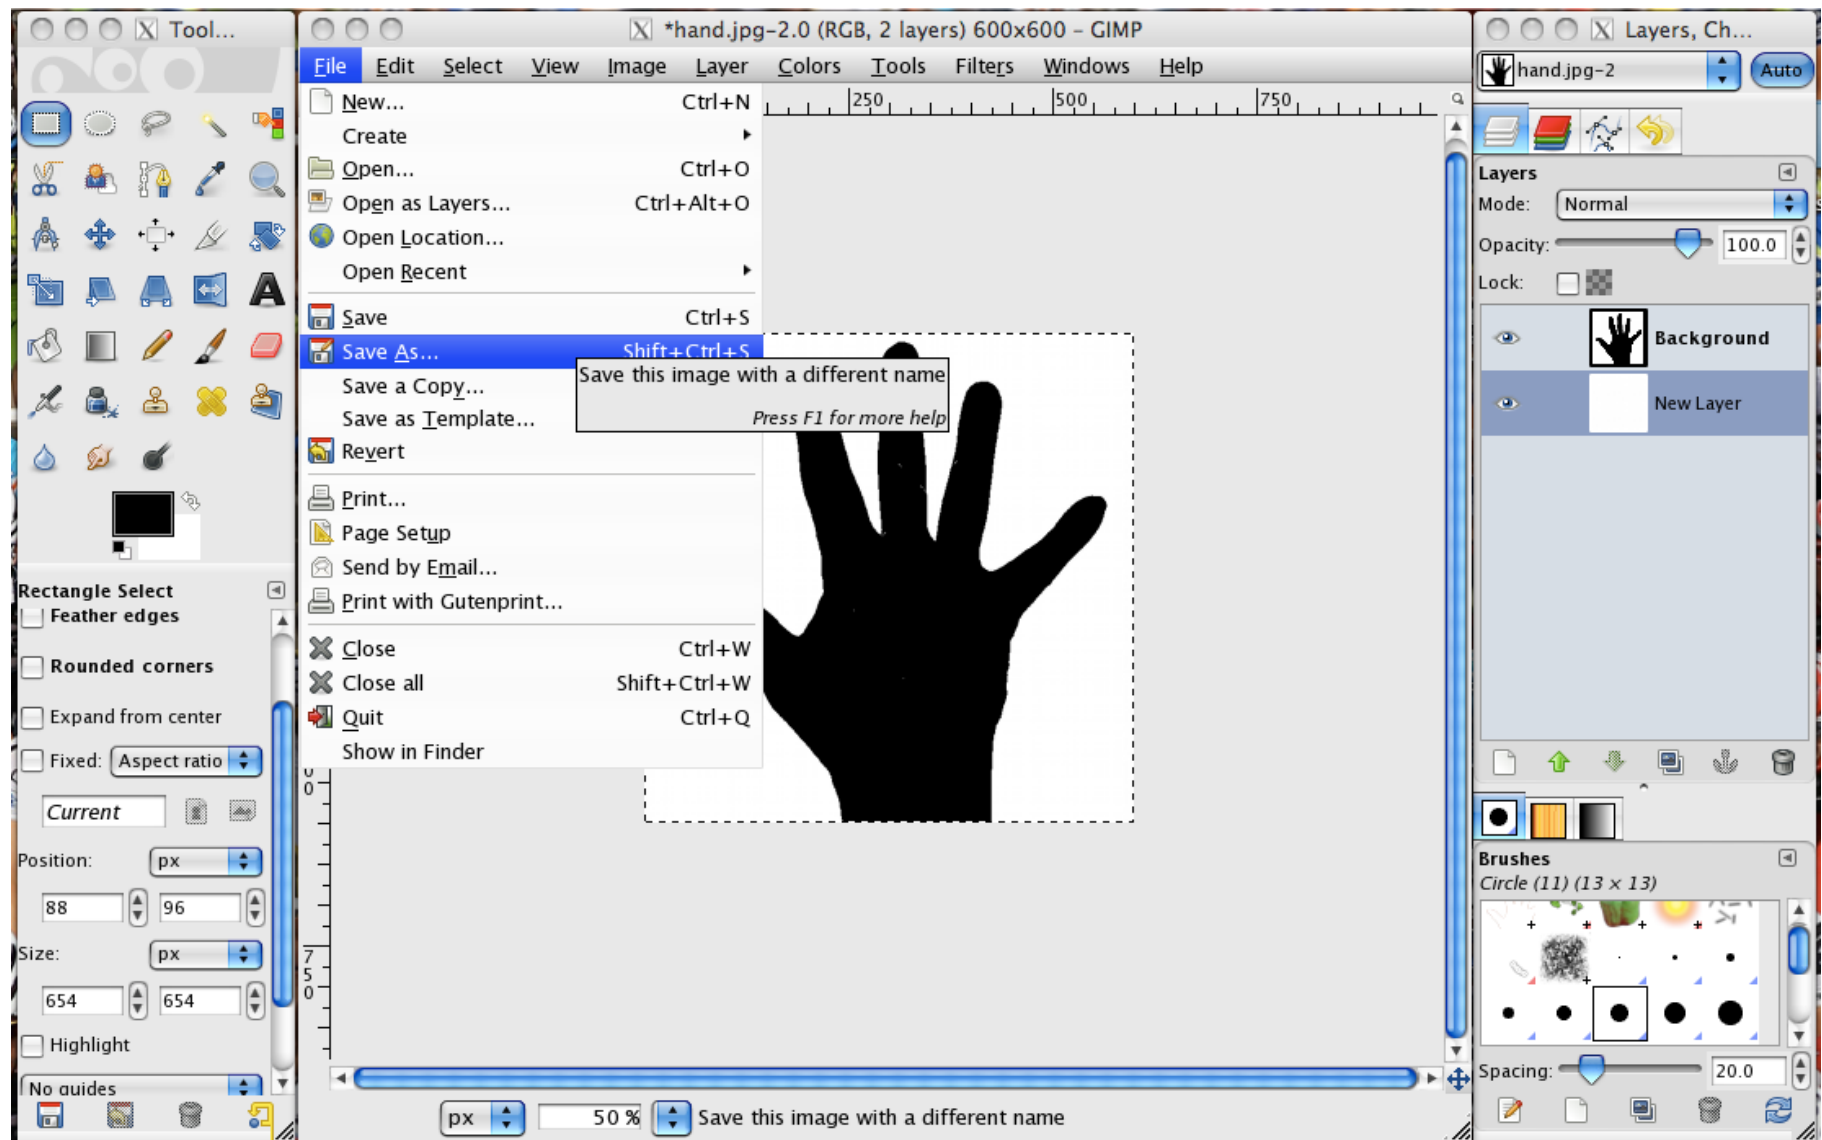

Supplementary Figure 23. STEP 5a: Access the save tool from File > Save As.

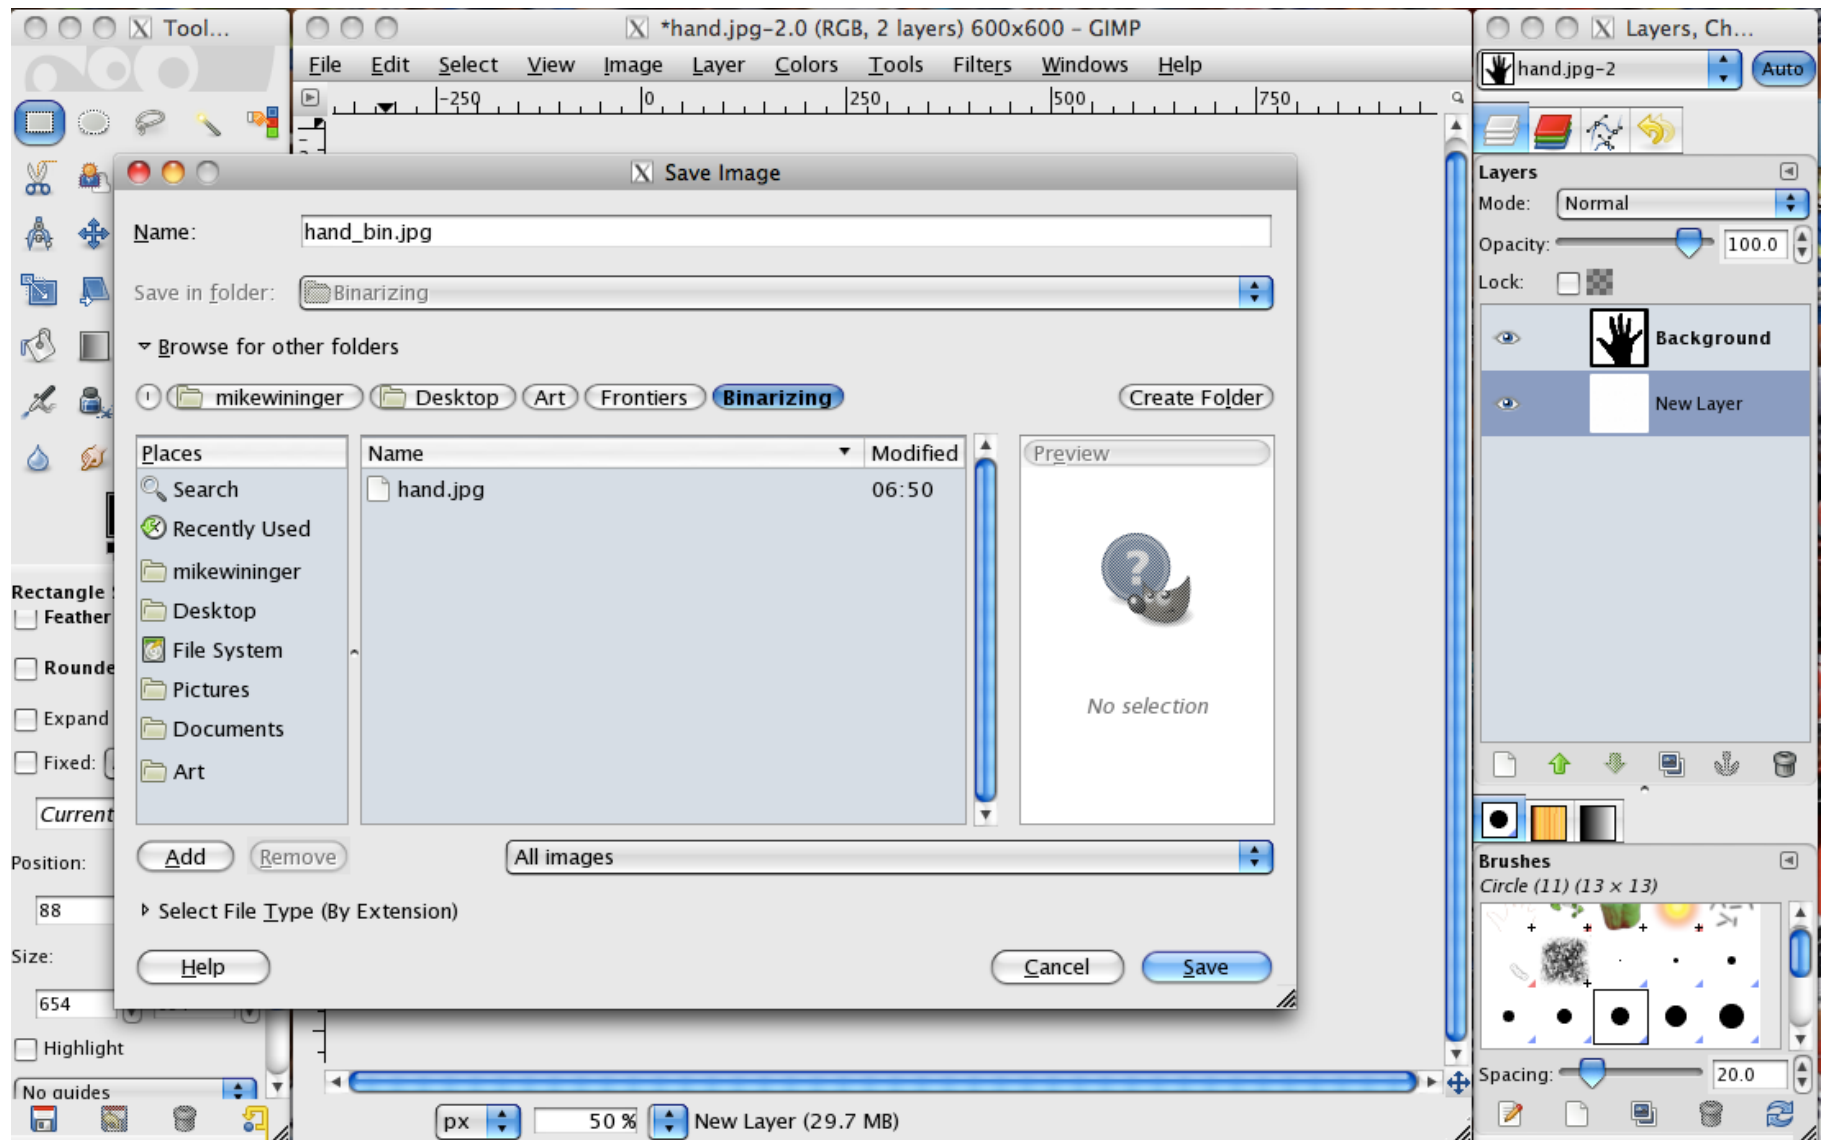

**Supplementary Figure 24.** STEP 5b: Save image under a different name (here suffixed with \_bin).

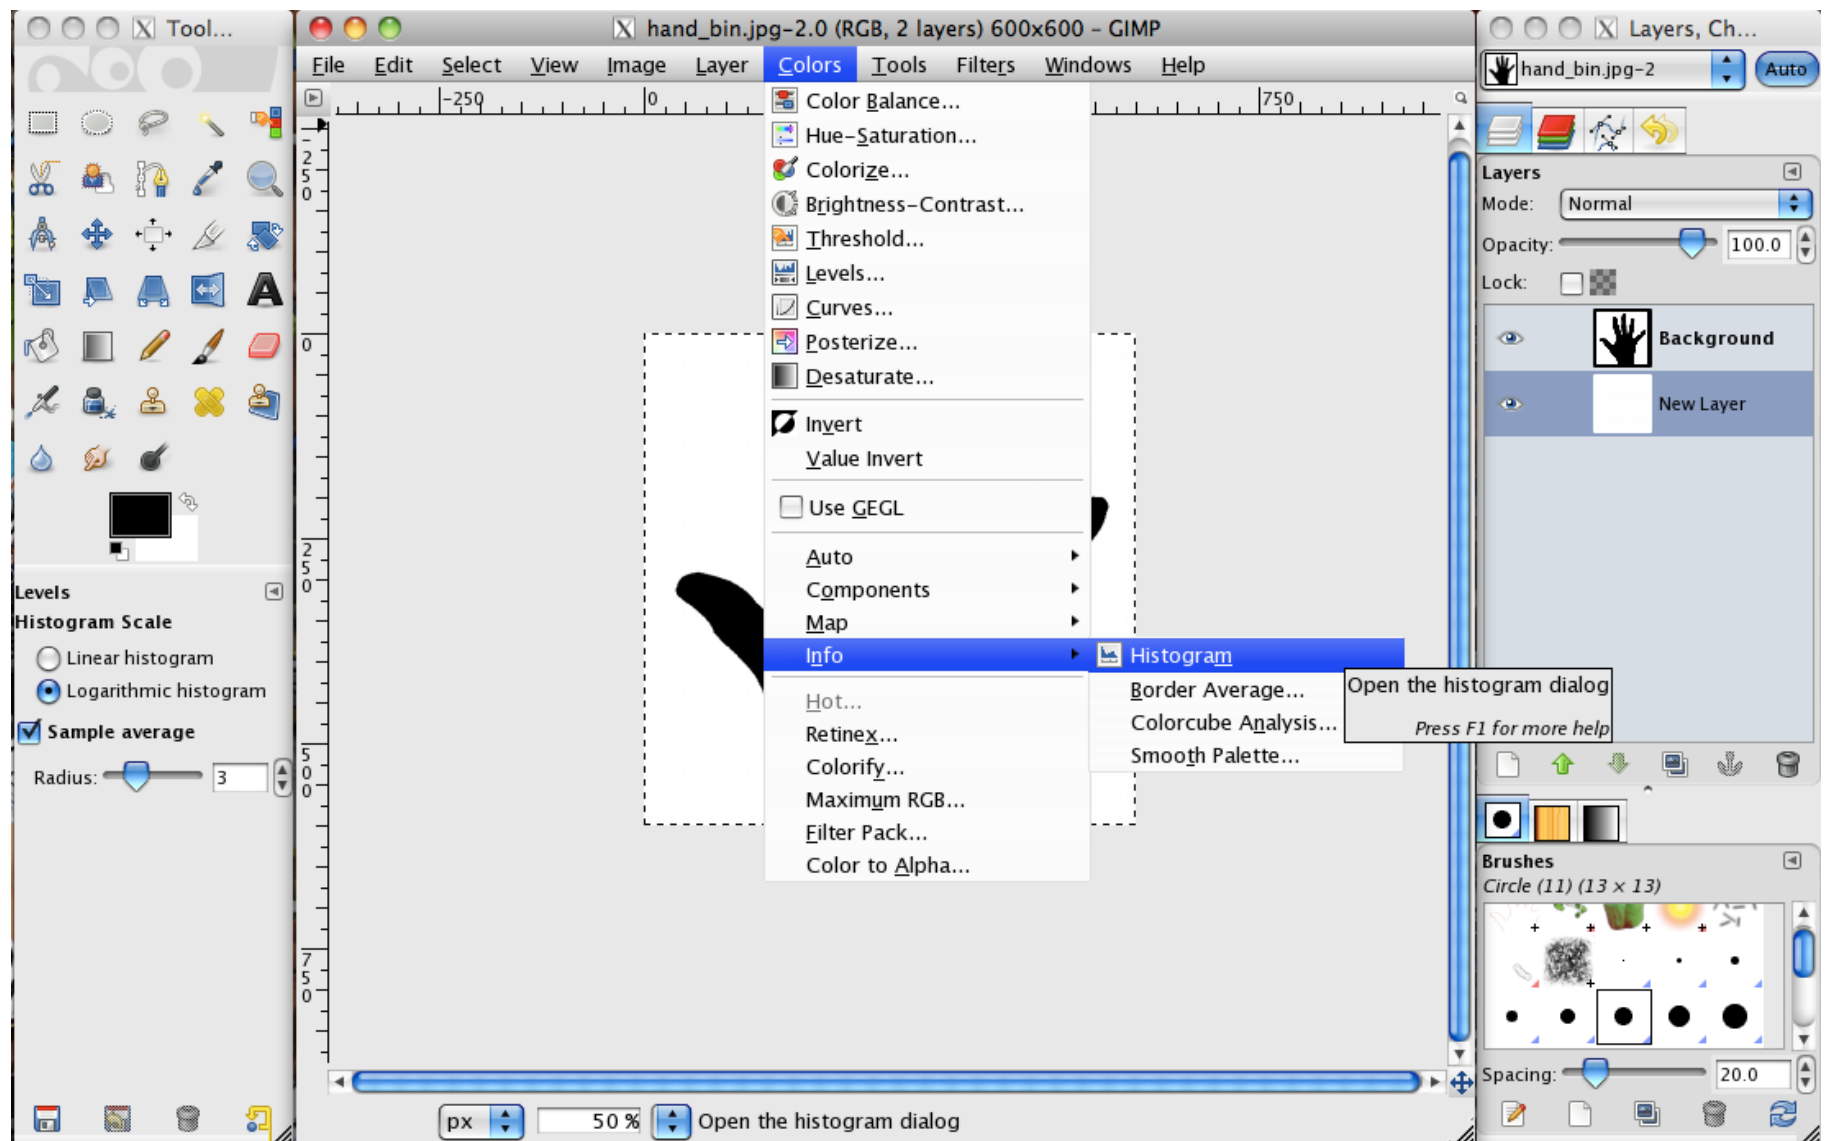

**Supplementary Figure 25.** STEP 6a: Access the pixel histogram tool from Colors > Info > Histogram.

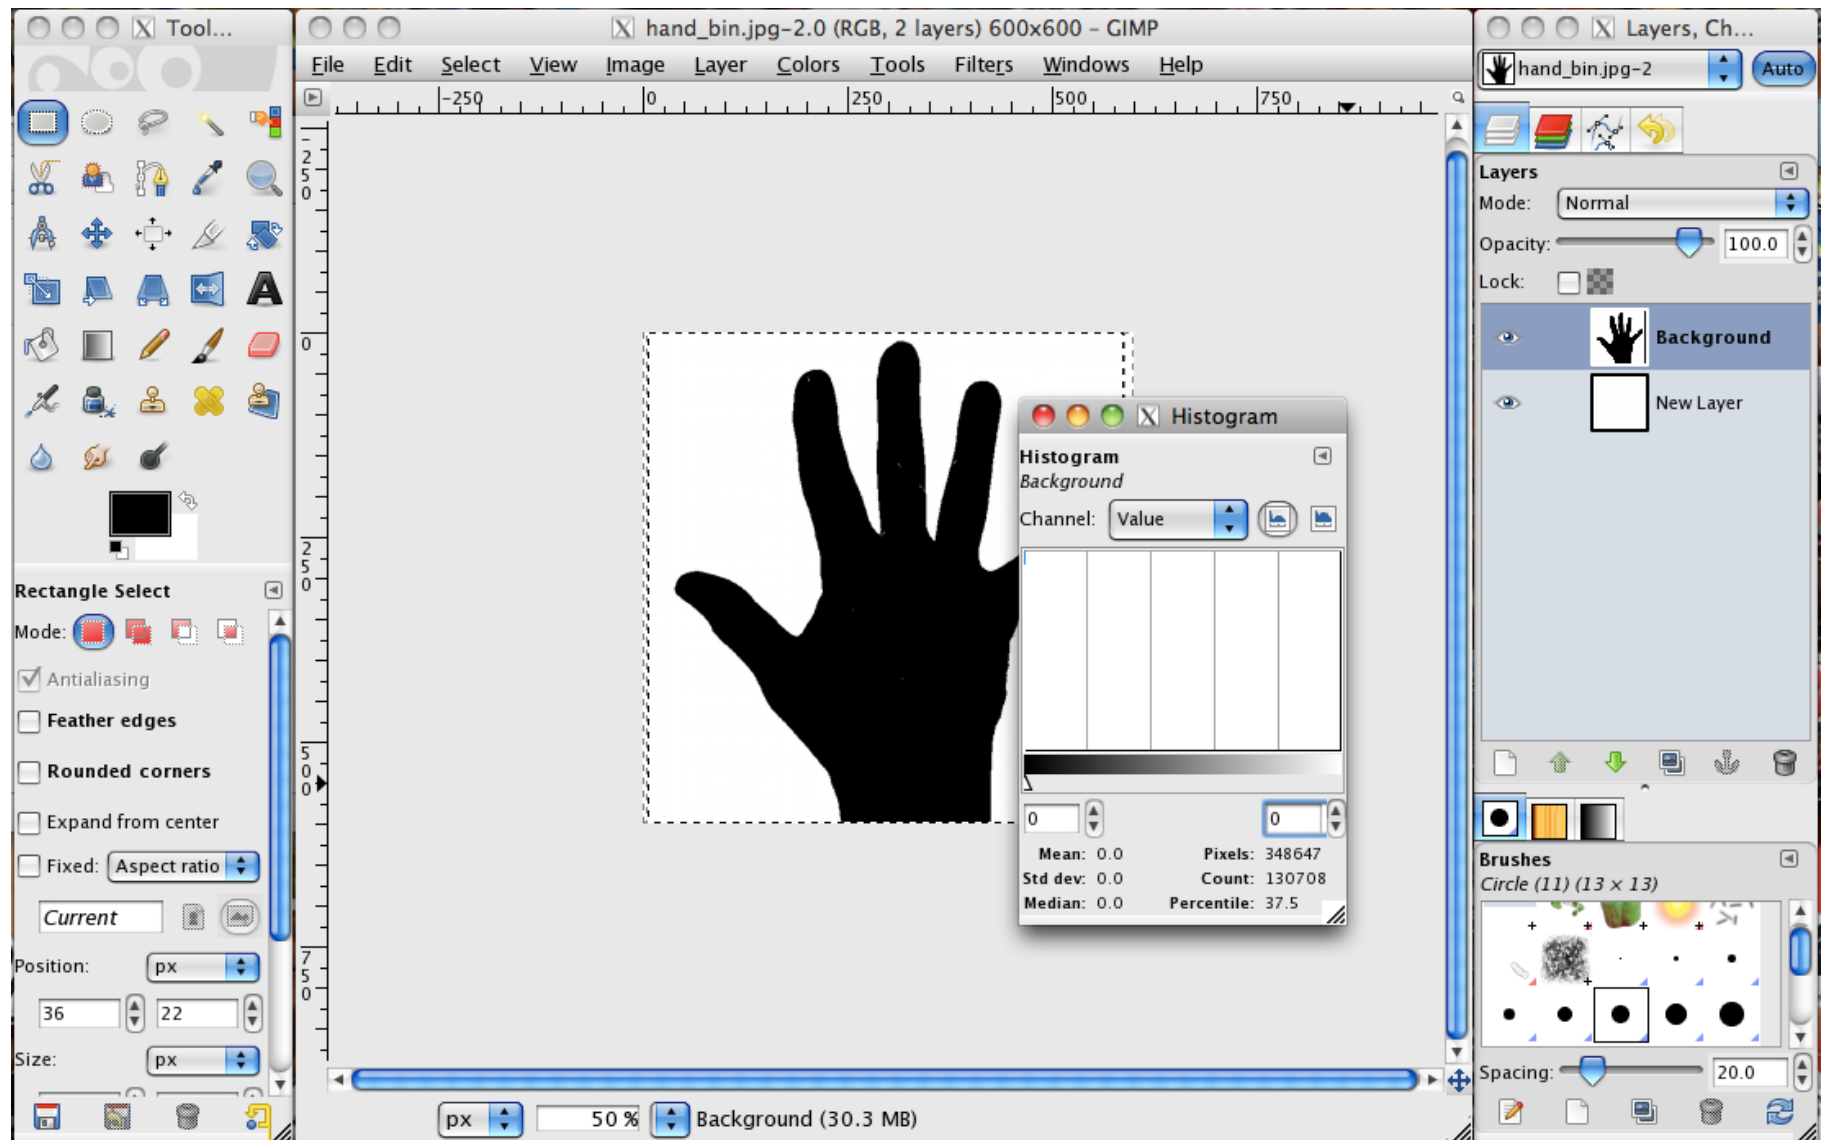

**Supplementary Figure 26.** STEP 5b: Specify the histogram range as counting only pixels 0 to 0 (two text boxes near bottom of tool). Note the pixel count (here: 130708 black pixels).
